1 **A *KARRIKIN INSENSITIVE2* paralog in lettuce mediates highly sensitive germination**  
2 **responses to karrikinolide**

3  
4 Stephanie E. Martinez<sup>1</sup>, Caitlin E. Conn<sup>2</sup>, Angelica M. Guercio<sup>3</sup>, Claudia Sepulveda<sup>1</sup>, Christopher  
5 J. Fiscus<sup>1</sup>, Daniel Koenig<sup>1</sup>, Nitzan Shabek<sup>3</sup>, David C. Nelson<sup>1\*</sup>

6  
7 <sup>1</sup>Department of Botany and Plant Sciences, University of California, Riverside, CA 92521 USA

8 <sup>2</sup>Department of Biology, Berry College, Mount Berry, GA 30149 USA

9 <sup>3</sup>Department of Plant Biology, University of California, Davis, CA 95616 USA

10

11 **Running title:** Evolution of karrikin perception

12

13 **Corresponding author:** David C. Nelson, [david.nelson@ucr.edu](mailto:david.nelson@ucr.edu)

14

15 **Classification:** Plant biology

16

17 **Keywords:** plant hormones, signaling, germination, smoke

18 **ABSTRACT**

19 Karrikins (KARs) are chemicals in smoke that can enhance germination of many plants. *Lactuca*  
20 *sativa* cv. Grand Rapids (lettuce), germinates in the presence of nanomolar karrikinolide (KAR<sub>1</sub>).  
21 We found that lettuce is much less responsive to KAR<sub>2</sub> or a mixture of synthetic strigolactone  
22 analogs, *rac*-GR24. We investigated the molecular basis of selective and sensitive KAR<sub>1</sub>  
23 perception in lettuce. The lettuce genome contains two copies of *KARRIKIN INSENSITIVE2*  
24 (*KAI2*), a receptor that is required for KAR responses in *Arabidopsis thaliana*. *LsKAI2b* is more  
25 highly expressed than *LsKAI2a* in dry achenes and during early stages of seed imbibition.  
26 Through cross-species complementation assays in *Arabidopsis* we found that *LsKAI2b* confers  
27 robust responses to KAR<sub>1</sub>, but *LsKAI2a* does not. Therefore, *LsKAI2b* likely mediates KAR<sub>1</sub>  
28 responses in lettuce. We compared homology models of the ligand-binding pockets of *KAI2*  
29 proteins from lettuce and a fire follower, *Emmenanthe penduliflora*. This identified pocket residues  
30 96, 124, 139, and 161 as candidates that influence the ligand-specificity of *KAI2*. Further support  
31 for the significance of these residues was found through a broader comparison of pocket residue  
32 conservation among 324 asterid *KAI2* proteins. We tested the effects of substitutions at these  
33 four positions in *Arabidopsis thaliana KAI2* and found that a broad array of responses to KAR<sub>1</sub>,  
34 KAR<sub>2</sub>, and *rac*-GR24 could be achieved.

## 35 INTRODUCTION

36

37 Plants use several strategies for regeneration in the post-fire environment, including regrowth  
38 from surviving tissue (e.g. epicormic buds), physical release of seeds (e.g. serotiny), and  
39 germination from the soil seed bank. The ecological significance of post-fire germination is  
40 perhaps best illustrated by fire ephemerals (or, pyroendemics), short-lived plants that in some  
41 cases emerge only in the first one or two years after a fire. However, more than 1200 plant species  
42 broadly distributed throughout the angiosperms show positive germination responses to aerosol  
43 smoke or smoke-water solutions. Searches for germination regulators among the thousands of  
44 compounds present in smoke have yielded a number of stimulants such as karrikins,  
45 glyconitrile, and NO<sub>2</sub>, as well as inhibitors such as trimethylbutenolide and related furanones  
46 (Keeley and Fotheringham, 1997; Flematti et al., 2004; Light et al., 2010; Flematti et al., 2011;  
47 Nelson et al., 2012; Burger et al., 2018; Keeley and Pausas, 2018).

48

49 Karrikins (KARs) are a class of butenolide molecules found in smoke and biochar that are  
50 produced by pyrolysis of carbohydrates (Flematti et al., 2004; Kochanek et al., 2016). KARs were  
51 discovered through bioassay-guided fractionation of smoke-water. This approach used several  
52 species that show sensitive responses to smoke-water, including *Lactuca sativa* cv. Grand Rapids  
53 (Asterales; common name lettuce) and the Australian fire-followers *Conostylis aculeata*  
54 (Commelinales) and *Stylidium affine* (Asterales), as biological readouts for the presence of  
55 germination stimulants. Karrikinolide (KAR<sub>1</sub>), the first karrikin to be identified, enhanced  
56 germination of these species at concentrations below 1 nM. (Flematti et al., 2004; van Staden et  
57 al., 2004) At least six KARs are found in smoke (Flematti et al., 2009). KAR<sub>1</sub> is presumed to be  
58 the most potent karrikin for many plants (Flematti et al., 2007; Sun et al., 2020). However,  
59 *Arabidopsis thaliana* is more sensitive to KAR<sub>2</sub> than KAR<sub>1</sub> (Nelson et al., 2009; Nelson et al.,  
60 2010)

61

62 KAR responses in plants are mediated by an  $\alpha/\beta$ -hydrolase protein, KARRIKIN INSENSITIVE2  
63 (KAI2)/HYPOSENSITIVE TO LIGHT (HTL) (Waters et al., 2012). Upon activation, KAI2/HTL  
64 associates with the F-box protein MORE AXILLARY GROWTH2 (MAX2)/DWARF3 (D3) and a  
65 subset of proteins in the SUPPRESSOR OF MAX2 1 (SMAX1)-LIKE (SMXL) family, SMAX1 and  
66 SMXL2. MAX2 acts within an SCF-type E3 ubiquitin ligase complex to target SMAX1 and SMXL2  
67 for proteasomal degradation (Stanga et al., 2013; Stanga et al., 2016; Khosla et al., 2020; Zheng  
68 et al., 2020; Wang et al., 2020b). SMAX1, and presumably SMXL2, associate with the

69 transcriptional co-repressors TOPLESS (TPL) and TPL-related (TPR) through an EAR motif  
70 (Soundappan et al., 2015). Therefore, degradation of SMAX1 and SMXL2 is thought to relieve  
71 transcriptional repression and initiate downstream growth responses. In addition to promoting  
72 seed germination, the KAR signaling pathway enhances seedling photomorphogenesis, root hair  
73 density, root hair elongation, and stress tolerance; suppresses mesocotyl elongation in the dark;  
74 and enables symbiotic interactions with arbuscular mycorrhizal fungi (Nelson et al., 2010; Waters  
75 et al., 2012; Gutjahr et al., 2015; Li et al., 2017; Wang et al., 2018; Villaécija-Aguilar et al., 2019;  
76 Carbonnel et al., 2020a; Choi et al., 2020; Li et al., 2020; Shah et al., 2020; Zheng et al., 2020;  
77 Carbonnel et al., 2020b).

78  
79 KAI2 is an ancient paralog of the strigolactone (SL) receptor DWARF14 (D14)/DECREASED  
80 APICAL DOMINANCE2 (DAD2)/RAMOSUS3 (RMS3) (Hamiaux et al., 2012; de Saint Germain  
81 et al., 2016; Yao et al., 2016). SLs are butenolide molecules like KARs, but have altogether  
82 different molecular structures, sources, and functions in plants. Canonical SLs consist of a tricyclic  
83 ABC-ring connected by an enol-ether bond to a butenolide D-ring in the 2'R stereochemical  
84 configuration. Noncanonical SLs are similar, but lack cyclized ABC rings (Al-Babili and  
85 Bouwmeester, 2015; Yoneyama et al., 2018). SLs are carotenoid-derived plant hormones that  
86 regulate axillary bud outgrowth (i.e. shoot branching or tillering), leaf senescence, cambium  
87 development, and drought tolerance, among other developmental processes (Gomez-Roldan et  
88 al., 2008; Umehara et al., 2008; Agusti et al., 2011; Ueda and Kusaba, 2015; Li et al., 2020). SLs  
89 are also exuded into the soil, particularly under low N or P conditions, which promotes beneficial  
90 symbiotic interactions with arbuscular mycorrhizal fungi (Akiyama et al., 2005; Al-Babili and  
91 Bouwmeester, 2015; Yoneyama et al., 2018). Obligate parasitic plants in the Orobanchaceae,  
92 such as witchweeds (*Striga* spp.) and broomrapes (*Orobanche*, *Phelipanche* spp.) have evolved  
93 the ability to use very low levels of SLs in the rhizosphere as germination cues that indicate the  
94 presence of a potential host (Bouwmeester et al., 2021; Nelson, 2021). SL signaling is highly  
95 similar to KAR signaling. Upon activation by SL, D14 works with SCF<sup>MAX2</sup> to target a different  
96 subset of SMXL proteins (SMXL6, SMXL7, and SMXL8 in Arabidopsis, or the orthologous  
97 DWARF53 protein (D53) in rice) for proteasomal degradation (Jiang et al., 2013; Zhou et al.,  
98 2013; Soundappan et al., 2015; Wang et al., 2015; Liang et al., 2016; Yao et al., 2016). Like  
99 SMAX1 and SMXL2, DWARF53 and its orthologs have one or more conserved EAR motifs and  
100 interact with TPL/TPR proteins (Jiang et al., 2013; Soundappan et al., 2015; Wang et al., 2015).  
101 D53 regulates downstream gene expression in monocots through interaction with SQUAMOSA-  
102 PROMOTER BINDING PROTEIN-LIKE (SPL) transcription factors (Liu et al., 2017; Song et al.,

103 2017). SMXL6 is also likely to work with transcription factors, but can bind DNA to regulate  
104 transcription directly as well (Wang et al., 2020a).

105

106 KAI2 proteins in plants collectively perceive a diverse range of signals. In Arabidopsis, KAI2  
107 mediates responses to GR24<sup>ent-5DS</sup>, a synthetic SL analog that has a D-ring in an unnatural 2'S  
108 configuration, as well as KARs (Waters et al., 2012; Scaffidi et al., 2014). There is substantial  
109 biochemical evidence that KAI2 can bind KAR<sub>1</sub>, which in combination with genetic evidence has  
110 led to the reasonable conclusion that KAI2 is a KAR receptor (Guo et al., 2013; Kagiya et al.,  
111 2013; Toh et al., 2014; Xu et al., 2016; Lee et al., 2018; Xu et al., 2018; Bürger et al., 2019).  
112 However, it now seems more likely that KAI2 perceives an unknown KAR metabolite(s) (Waters  
113 et al., 2015; Xu et al., 2018). Differential scanning fluorimetry (DSF) assays show that KAI2  
114 undergoes thermal destabilization *in vitro* in the presence of GR24<sup>ent-5DS</sup>, but not KAR<sub>1</sub> or KAR<sub>2</sub>  
115 (Waters et al., 2015). Similarly, *rac*-GR24 or GR24<sup>ent-5DS</sup>, but not KAR<sub>1</sub>, promotes protein-protein  
116 interactions between KAI2 and MAX2, SMAX1, or SMXL2 (Xu et al., 2018; Khosla et al., 2020;  
117 Wang et al., 2020b). Therefore, unmodified KARs probably cannot activate KAI2 directly, but  
118 GR24<sup>ent-5DS</sup> can. Putatively, KAI2 also perceives an undiscovered, endogenous signal in plants  
119 known as KAI2 ligand (KL) (Conn and Nelson, 2015). Evidence for KL include *kai2* and *max2*  
120 mutant phenotypes that are opposite to the effects of KAR treatment which are not observed in  
121 SL biosynthesis or signaling mutants (Nelson et al., 2011; Waters et al., 2012). In addition, highly  
122 conserved KAI2 paralogs (KAI2c) in root parasitic plants can rescue an Arabidopsis *kai2* mutant  
123 but do not respond to KARs, suggesting they sense another signal in plants (Conn et al., 2015;  
124 Conn and Nelson, 2015). KAI2 has undergone an atypical degree of gene duplication in the  
125 Orobanchaceae (Lamiales), resulting in a parasite-specific clade of fast-evolving, divergent KAI2  
126 paralogs (KAI2d) that can perceive different SLs and, in one case, isothiocyanates (Conn et al.,  
127 2015; Toh et al., 2015; Tsuchiya et al., 2015; de Saint Germain et al., 2021). D14 itself is another  
128 example of a SL receptor that was derived from KAI2 (Bythell-Douglas et al., 2017). Finally, a  
129 KAI2 representative from a grade that has undergone an intermediate level of purifying selection,  
130 *Striga hermonthica* KAI2i (*ShKAI2i*), confers KAR-specific responses and only weakly rescues  
131 Arabidopsis *kai2* (Conn et al., 2015; Conn and Nelson, 2015).

132

133 These observations raise the question of how different ligand specificities have evolved in KAI2  
134 proteins, enabling some plants to gain beneficial traits such as post-fire germination or host-  
135 induced germination. We set out to determine the basis of highly sensitive germination responses

136 to KAR in lettuce, which we reasoned might give clues to how some species have adapted to fire-  
137 prone ecosystems.

138

## 139 RESULTS

140

### 141 Lettuce achenes are more sensitive to KAR<sub>1</sub> than KAR<sub>2</sub>

142 We first tested whether lettuce achenes have different sensitivity to KAR<sub>1</sub>, KAR<sub>2</sub>, and *rac*-GR24,  
143 a racemic mixture of GR24<sup>ent-5DS</sup> and its 2'*R*-configured enantiomer GR24<sup>5DS</sup> (Figure 1A). Prior  
144 work had suggested that KAR<sub>1</sub> is a more effective stimulant of lettuce germination than KAR<sub>2</sub>, but  
145 the compounds were tested in separate experiments, limiting a direct comparison (Flematti et al.,  
146 2007). We found that 1 μM KAR<sub>1</sub> and KAR<sub>2</sub> treatments induced ~100% germination of lettuce in  
147 the dark, compared to ~40% germination for mock-treated achenes (Figure 1B). 1 μM *rac*-GR24  
148 also stimulated lettuce germination, but was less effective than either KAR. To determine whether  
149 KAR<sub>1</sub> or KAR<sub>2</sub> is more potent, we evaluated the effects of a range of KAR<sub>1</sub> and KAR<sub>2</sub>  
150 concentrations on lettuce germination. KAR<sub>1</sub> induced nearly complete germination at 1 nM and  
151 higher concentrations (Figure 1C). By contrast, 1 nM and 10 nM KAR<sub>2</sub> did not enhance  
152 germination, and 100 nM KAR<sub>2</sub> had an intermediate effect compared to 1 μM KAR<sub>2</sub>.

153

154 As an additional test of lettuce achene responses to KAR<sub>1</sub>, KAR<sub>2</sub>, and *rac*-GR24, we examined  
155 how each treatment affected the expression of *D14-LIKE2* (*DLK2*). *DLK2* is an ancient paralog of  
156 *KAI2* and *D14* that serves as a transcriptional marker of KAR/KL signaling in diverse angiosperms  
157 such as *Arabidopsis thaliana*, *Brassica tournefortii*, *Oryza sativa* (rice), and *Lotus japonicus*  
158 (Waters et al., 2012; Sun et al., 2016; Sun et al., 2020; Carbonnel et al., 2020b). In achenes  
159 imbibed 24 h in the dark with KAR or *rac*-GR24 treatments, *LsDLK2* (*Lsat\_1\_v5\_gn\_8\_94781*)  
160 transcripts were induced approximately 20-fold by 1 μM KAR<sub>1</sub> compared to mock treatment  
161 (Figure 1D). *LsDLK2* transcripts were increased ~4-fold by 1 μM KAR<sub>2</sub> and ~2-fold by 1 μM *rac*-  
162 GR24 compared to mock treatment, but these changes were not statistically significant ( $p > 0.05$ ,  
163 Dunnett's T3 multiple comparisons test). Altogether, these data indicate that lettuce achenes are  
164 much more sensitive to KAR<sub>1</sub> than KAR<sub>2</sub> or *rac*-GR24.

165

### 166 Lettuce has two *KAI2* paralogs that have differential expression in seed

167 We hypothesized that altered ligand-specificity or -affinity of a *KAI2* protein(s) may underlie the  
168 high sensitivity to KAR<sub>1</sub> observed in lettuce. A BLAST search of the lettuce draft genome revealed  
169 two putative *KAI2* orthologs that we designated *LsKAI2a* and *LsKAI2b* (Table S1). We performed

170 a phylogenetic analysis to determine whether either of these genes are *KAI2i*-type, which had  
171 previously been associated with selective responses to KAR<sub>1</sub> (Conn et al., 2015; Conn and  
172 Nelson, 2015). We found that neither *LsKAI2* paralog grouped with the Lamiid *KAI2i* grade (Figure  
173 2). Instead, *LsKAI2a* and *LsKAI2b* form a monophyletic sister group to the Lamiid *KAI2c* clade,  
174 suggesting that they emerged from a gene duplication that occurred after the divergence of the  
175 Lamiids and the Campanulids.

176  
177 We examined whether *LsKAI2a* and *LsKAI2b* are expressed at different levels in achenes, as it  
178 might highlight one gene as a more likely candidate for mediating KAR<sub>1</sub> responses during  
179 germination. In dry, unimbibed achenes, *LsKAI2b* transcripts were ~5-fold more abundant than  
180 *LsKAI2a* transcripts. *LsKAI2b* transcript abundance progressively declined after 6 h and 24 h of  
181 imbibition, whereas *LsKAI2a* rose slightly after 24 h imbibition (Figure 3). This suggested that  
182 *LsKAI2b* protein may be more abundant than *LsKAI2a* during the early stages of imbibition.

#### 183 184 ***LsKAI2b* confers KAR<sub>1</sub> responses to Arabidopsis seedlings**

185 We then set out to determine whether *LsKAI2a* and *LsKAI2b* proteins have different ligand  
186 preferences. Because KAR metabolites and the endogenous KL remain unknown, it was not  
187 possible to test receptor-ligand affinities *in vitro*. Instead, we used cross-species complementation  
188 assays to investigate the responses of *LsKAI2a* and *LsKAI2b* to KARs and *rac*-GR24. We cloned  
189 *LsKAI2a* and *LsKAI2b* genes (coding sequence including intron) into a plant transformation vector  
190 that drives transgene expression from an *Arabidopsis thaliana* *KAI2* (*AtKAI2*) promoter. We  
191 generated homozygous transgenic lines for *AtKAI2p:LsKAI2A* and *AtKAI2p:LsKAI2B* in an  
192 *Arabidopsis d14 kai2* background, which does not respond to KARs or *rac*-GR24. As a control,  
193 we tested *d14 kai2* lines transgenic for an *Arabidopsis KAI2* coding sequence.

194  
195 We tested the inhibitory effects of 1 μM KAR<sub>1</sub>, KAR<sub>2</sub>, and *rac*-GR24 on hypocotyl elongation of  
196 seedlings grown under continuous red light (Figure 4). This assay provides a useful alternative to  
197 *Arabidopsis* germination tests, which are often challenging to perform consistently due to variable  
198 and labile seed dormancy. As expected, *AtKAI2p:AtKAI2* rescued the elongated hypocotyl  
199 phenotype of *d14 kai2* and restored responses to KAR<sub>1</sub>, KAR<sub>2</sub>, and *rac*-GR24. KAR<sub>2</sub> caused a  
200 stronger reduction in hypocotyl elongation than KAR<sub>1</sub>, as observed in wild-type (wt) Col-0  
201 *Arabidopsis* seedlings. Responses to *rac*-GR24 were partially reduced compared to wt due to the  
202 lack of *D14*-mediated signaling. The *LsKAI2a* transgene had mixed effects in different transgenic  
203 lines. All lines had reduced hypocotyl length under mock-treated conditions compared to *d14 kai2*,



204 suggesting rescue of KL response. Only the line with the strongest *LsKAI2a* expression showed  
205 a response to KAR<sub>1</sub> or KAR<sub>2</sub>, and this was weak compared to KAR responses in *AtKAI2*  
206 transgenic lines (Figure 4, S1A). Inhibition of hypocotyl elongation by *rac*-GR24 was also weak,  
207 and was only observed in two transgenic lines. By contrast, *LsKAI2b* conferred a strong and  
208 specific response to KAR<sub>1</sub>. The degree of hypocotyl growth inhibition by KAR<sub>1</sub> in *LsKAI2b* lines  
209 exceeded that observed in wt and *AtKAI2* transgenic lines, despite lower levels of *LsKAI2b*  
210 expression compared to *AtKAI2* (Figure 4, S1A). KAR<sub>2</sub> did not affect hypocotyl elongation of  
211 *AtKAI2p:LsKAI2b* lines, and *rac*-GR24 had inconsistent and comparatively weak effects.  
212 Hypocotyl elongation under mock-treated conditions was only reduced in one transgenic line,  
213 which had the highest *LsKAI2b* expression. In terms of rescue of the reduced expression of *DLK2*  
214 in *d14 kai2* seedlings, neither *LsKAI2a* or *LsKAI2b* were as effective as *AtKAI2* (Figure S1B).

215  
216 We compared the responses of wt and *AtKAI2p:LsKAI2b d14 kai2* seedlings to a range of KAR<sub>1</sub>  
217 concentrations (Figure S1C). We found that 100 nM and higher concentrations of KAR<sub>1</sub> caused a  
218 reduction in hypocotyl elongation of wt seedlings. In an *LsKAI2b* transgenic line, however, 1 nM  
219 KAR<sub>1</sub> was sufficient to cause a similar response (Figure S1C). In the presence of 1 μM KAR<sub>1</sub>,  
220 hypocotyl elongation was inhibited 78% in the *LsKAI2b* transgenic line compared to 38% inhibition  
221 in wt. As the expression of *LsKAI2b* was at least two-fold lower than endogenous *KAI2* in wt  
222 Arabidopsis, this suggests that *LsKAI2b* is highly effective at transducing KAR<sub>1</sub> responses (Figure  
223 S1A).

224

### 225 **Structural differences in the LsKAI2b pocket may influence KAR<sub>1</sub> sensitivity**

226 Although *LsKAI2a* and *LsKAI2b* proteins share 84% amino acid identity and 94% similarity,  
227 *LsKAI2b* is uniquely able to confer highly sensitive KAR<sub>1</sub> responses to *Arabidopsis thaliana*. We  
228 investigated which amino acid differences might alter the ligand specificity and/or affinity of  
229 *LsKAI2b*. To predict the overall structures and ligand-binding pocket morphologies of *LsKAI2a*  
230 and *LsKAI2b*, we generated protein structure homology models using Phyre2 with ShKAI2iB (PDB  
231 structure 5DNW) as a template (Kelley et al., 2015; Xu et al., 2016). Of the 43 amino acid  
232 differences between *LsKAI2a* and *LsKAI2b*, seven are in pocket-defining residues: V/M96,  
233 Y/F124, Y/F134, D/E138E, L/V139, M/I146, A/V161 (Figure 5A,B; for consistency, equivalent  
234 *AtKAI2* position numbers are used here and below). The differences at these positions are  
235 predicted to substantially enlarge the volume of the pocket in *LsKAI2b* relative to *LsKAI2a* (Figure  
236 5A,B). *LsKAI2b* has a pocket volume of 189 Å<sup>3</sup>, compared to 126 Å<sup>3</sup> for *LsKAI2a* and 126 Å<sup>3</sup> for  
237 *AtKAI2* (PDB structure 5Z9G) (Lee et al., 2018). Particularly notable differences that affect pocket



238 shape in lettuce KAI2 proteins are found among the residues that surround  $\alpha$ -helix 4; these  
239 residues are bulkier and more of them are positively charged in LsKAI2a than in LsKAI2b (Figure  
240 5A-B).

241  
242 We hypothesized that similar changes to the volume or chemical properties of the KAI2 ligand-  
243 binding pocket as those found in lettuce might have occurred in other species that have evolved  
244 sensitive responses to KAR<sub>1</sub>. The Californian chaparral species, *Emmenanthe penduliflora*  
245 (Boraginales; common name, “whispering bells”) is a smoke-responsive annual that primarily  
246 emerges in post-fire sites. Its germination can be triggered by nitric oxides (e.g. NO<sub>2</sub>) from smoke  
247 as well as by <10 nM KAR<sub>1</sub> (Keeley and Fotheringham, 1997; Flematti et al., 2004; Flematti et al.,  
248 2007). To investigate KAI2 evolution in this fire-follower, we generated a *de novo* transcriptome  
249 assembly from RNA extracted from seedlings. We identified two KAI2 coding sequences (Table  
250 S1). The predicted EpKAI2a and EpKAI2b protein sequences are 74% identical. Among the 70  
251 amino acid differences, five are in pocket-defining residues (V/L96, Y/F124, L/I139, A/V161,  
252 M/F190). As with lettuce KAI2 proteins, the differences at these five positions are predicted to  
253 substantially enlarge the pocket volume of EpKAI2b compared to EpKAI2a (Figure 5C,D). The  
254 root mean square deviation (RMSD) for LsKAI2a and EpKAI2a models is 0.093 Å (Figure S2). By  
255 contrast, comparisons of LsKAI2b and LsKAI2a, EpKAI2b and EpKAI2a, and LsKAI2b and  
256 EpKAI2b indicate larger RMSD values ranging from 0.42 to 0.63 Å (Figure S2). These models  
257 suggest that EpKAI2b is a more likely candidate for a KAR<sub>1</sub>-specific receptor than EpKAI2a, which  
258 seems likely to have ligand preferences that are similar to LsKAI2a. Notably, four of the pocket-  
259 defining positions that distinguish EpKAI2a and EpKAI2b overlapped with those that distinguish  
260 LsKAI2a and LsKAI2b; specifically, positions 96, 124, 139, and 161.

### 261 262 **Conserved pocket residue changes among two major groups of asterid KAI2 paralogs**

263 We also compared the amino acid sequences of the parasitic plant proteins *Phelipanche*  
264 *aegyptiaca* KAI2c (PaKAI2c) and *Striga hermonthica* KAI2c (ShKAI2c) to ShKAI2i, which confers  
265 sensitive responses to KAR<sub>1</sub> to Arabidopsis (Conn et al., 2015; Conn and Nelson, 2015; Toh et  
266 al., 2015). Among the eight total positions that distinguish KAI2a and KAI2b pockets in either  
267 lettuce or *E. penduliflora*, seven substitutions (V96L, Y124F, E138D, L139V, M146I, C161V, and  
268 A/L190F) were observed in ShKAI2i relative to PaKAI2c and ShKAI2c (Figure S3). This revealed  
269 several pocket residue substitutions in KAI2b/KAI2i proteins that were consistent in lettuce, *E.*  
270 *penduliflora*, and *Striga hermonthica*: V96L/M, Y124F, L139V/I, and A/C161V. If EpKAI2b is

271 selectively responsive to KAR<sub>1</sub> like LsKAI2b and ShKAI2i, we hypothesized that these shared  
272 changes may cause their KAR<sub>1</sub> specificity.

273

274 To investigate whether similar differences occur at these positions among KAI2 paralogs in other  
275 asterids, we performed an in-depth examination of KAI2 protein sequences in *de novo*  
276 transcriptome assemblies that had been generated by the One Thousand Plants (1KP)  
277 consortium (One Thousand Plant Transcriptomes Initiative, 2019). Through reciprocal BLAST  
278 searches we identified 334 KAI2 protein sequences from 199 species (Table S2). As suggested  
279 by the Y124F substitution that was shared by LsKAI2b, EpKAI2b, and ShKAI2i, we found that  
280 asterid KAI2 proteins could be split into two major groups based upon Tyr or Phe identity at  
281 position 124. Only 12 of the 334 KAI2 proteins (3.6%) did not have Y124 or F124 residues.

282

283 Almost all species (188 of 199, 94.5%) had at least one Y124-type KAI2 paralog. By contrast,  
284 F124-type KAI2 paralogs were found in less than half of the species (88 of 199, 44.2%; Figure  
285 6A; Table S3). For 94 species, only one KAI2 was identified; for 85 of these species (90.4%), this  
286 protein was Y124-type and for 6 species (6.4%) it was F124-type. Although some *KAI2* genes are  
287 likely to have been missing from the *de novo* transcriptome assemblies (e.g. due to inadequate  
288 sequencing depth or RNA sampling), the disparity in these distributions suggests that plants  
289 require Y124-type KAI2 proteins, while F124-type KAI2 proteins may have more auxiliary  
290 functions. Notably, an F124-type KAI2 was not observed in any of the 36 Asterales transcriptomes  
291 surveyed (Figure 6A). This suggested that the emergence of an F124-type KAI2 (i.e. LsKAI2b) in  
292 lettuce may have occurred independently within the Asterales lineage. By contrast, the presence  
293 of an F124-type KAI2 (i.e. EpKAI2b) in *E. penduliflora* is typical for the Boraginales.

294

295 We identified 30 positions that define the KAI2 ligand-binding pocket. We examined amino acid  
296 conservation at these positions within the two major KAI2 groups in asterids. A high degree of  
297 conservation was observed within and across the two groups at 25 positions (Figure 6B).  
298 However, four positions in addition to 124 were well-conserved within each group and different  
299 between the groups. Positions 96, 124, 139, 161, and 190 stood out as candidates that might  
300 define ligand-specificity differences between the KAI2 groups. This broader analysis gave us  
301 reason to exclude positions 134, 138, and 146, which had been identified in LsKAI2a and LsKAI2b  
302 comparisons, from further consideration, as similar amino acid compositions were found among  
303 the two KAI2 groups. Position 190 was also de-prioritized, as LsKAI2b does not share the F190  
304 identity of other F124-type KAI2, but nonetheless confers sensitive KAR<sub>1</sub> responses (Figure S3).

305

### 306 **The impact of four pocket residues on ligand-specificity of KAI2**

307 To investigate whether positions 96, 124, 139, and 161 influence ligand-specificity, we generated  
308 a series of substitutions in AtKAI2 proteins. AtKAI2 shares V96, Y124, L139, and A161 identities  
309 with LsKAI2a, EpKAI2a, and most asterid Y124-type KAI2 proteins. We mimicked asterid F124-  
310 type KAI2 proteins at these positions by creating quadruple and triple mutant combinations of  
311 V96L, Y124F, L139I, and A161V substitutions in AtKAI2. (The variants are annotated here in  
312 superscripts by amino acid identities at positions 96, 124, 139, and 161, respectively, with non-  
313 AtKAI2 substitutions underlined.) The *AtKAI2* variants were introduced into the *Arabidopsis d14*  
314 *kai2* background and homozygous transgenic lines were tested for responses to KAR<sub>1</sub>, KAR<sub>2</sub>,  
315 and *rac*-GR24. We observed a range of ligand specificities among the variants. AtKAI2<sup>V<sup>EIV</sup></sup> was  
316 KAR<sub>1</sub>-specific, AtKAI2<sup>L<sup>YIV</sup></sup> was KAR<sub>1</sub>- and KAR<sub>2</sub>-specific, AtKAI2<sup>L<sup>FIA</sup></sup> showed reduced responses  
317 to KAR<sub>1</sub> and KAR<sub>2</sub>, and the quadruple mutant AtKAI2<sup>L<sup>FIV</sup></sup> was KAR<sub>1</sub>- and *rac*-GR24-specific  
318 (Figure 7A, S4). Interestingly, AtKAI2<sup>L<sup>FIV</sup></sup> conferred a stronger response to KAR<sub>1</sub> than triple-  
319 substituted variants or wt *AtKAI2*. AtKAI2<sup>L<sup>FLV</sup></sup> may be KL-specific, as it did not confer consistent  
320 responses to any of the treatments but did rescue hypocotyl elongation under mock-treated  
321 conditions.

322

323 We attempted to establish a relationship between specific amino acid changes in KAI2 and ligand  
324 specificity. We noted that KAR<sub>2</sub> response was highly reduced or absent in AtKAI2<sup>V<sup>EIV</sup></sup>, AtKAI2<sup>L<sup>FIA</sup></sup>,  
325 and AtKAI2<sup>L<sup>FIV</sup></sup> lines (Figure 7A, S4A). This suggested that Y124F, L139I, or a combination of  
326 both substitutions abolishes KAR<sub>2</sub> perception. Responses to *rac*-GR24 were highly reduced in  
327 AtKAI2<sup>V<sup>EIV</sup></sup> and AtKAI2<sup>L<sup>YIV</sup></sup>, which share L139I and A161V substitutions. This suggested that these  
328 positions may be relevant to *rac*-GR24 perception. However, it must be noted that AtKAI2<sup>L<sup>FIV</sup></sup> also  
329 has L139I and A161V substitutions but remained responsive to *rac*-GR24 (Figure 7A, S4A). The  
330 shortest hypocotyls under mock-treated conditions, which may indicate KL responsiveness, were  
331 observed in AtKAI2<sup>L<sup>FIV</sup></sup> transgenic lines (Figure S4A).

332

333 To investigate these hypotheses further, we examined the effects of three of the four single  
334 substitutions and five of the six possible double substitution combinations at positions 96, 124,  
335 139, and 161 (Figure 7B, S4B). Among the double mutants, AtKAI2<sup>L<sup>ELA</sup></sup> and AtKAI2<sup>V<sup>EIA</sup></sup> had similar  
336 effects; KAR<sub>2</sub> response was lost, while KAR<sub>1</sub> and *rac*-GR24 response remained. AtKAI2<sup>V<sup>YIV</sup></sup> lost  
337 responses to *rac*-GR24 and had reduced responses to KAR<sub>2</sub> and, to a lesser extent, KAR<sub>1</sub>.  
338 AtKAI2<sup>L<sup>YL</sup></sup> showed similar responses to KARs as AtKAI2<sup>V<sup>YIV</sup></sup>, but was not as strongly affected in

339 its *rac*-GR24 response. AtKAI2<sup>L<sup>Y1A</sup></sup> conferred similar responses to wt AtKAI2. Among the single  
340 mutants, AtKAI2<sup>L<sup>YLA</sup></sup> had highly reduced responses to KAR<sub>2</sub> and wt responses to KAR<sub>1</sub> and *rac*-  
341 GR24. AtKAI2<sup>V<sup>ELA</sup></sup> also showed highly reduced responses to KAR<sub>2</sub>, but had stronger responses  
342 to KAR<sub>1</sub> and *rac*-GR24 than wt AtKAI2. AtKAI2<sup>V<sup>Y1A</sup></sup> had wt responses to KAR<sub>1</sub>, KAR<sub>2</sub>, and *rac*-  
343 GR24 (Figure 7B, S4B). AtKAI2<sup>L<sup>ELA</sup></sup> seedlings showed the weakest rescue of hypocotyl elongation  
344 under mock-treated conditions, suggesting that KL perception may have been reduced more than  
345 in other variants (Figure S4B).

346

347 From these data, we conclude that Y124F is sufficient to reduce KAR<sub>2</sub> response. Indeed, every  
348 transgene with Y124F conferred little or no response to KAR<sub>2</sub>. V96L also reduced KAR<sub>2</sub> response  
349 as a single substitution, but did not have a consistent effect when combined with other  
350 substitutions. The effects of L139I and A161V substitutions were harder to decipher, but it is  
351 notable that five of the six variants with A161V had the weakest responses to *rac*-GR24.

352

## 353 DISCUSSION

354

355 We identified two receptors, LsKAI2a and LsKAI2b, encoded in the lettuce genome that might  
356 activate germination in the presence of nanomolar KAR<sub>1</sub>. We propose that *LsKAI2b* is responsible  
357 for germination responses to KAR<sub>1</sub> because 1) it is expressed more abundantly in achenes during  
358 early stages of imbibition than *LsKAI2a*, and 2) it confers sensitive and specific responses to KAR<sub>1</sub>  
359 when expressed in *Arabidopsis thaliana*, while *LsKAI2a* does not. In the future, isolating loss-of-  
360 function mutations of these genes would be an ideal approach to conclusively determine their  
361 roles in KAR<sub>1</sub>-induced germination of lettuce. Interestingly, we found that a KAR<sub>1</sub>-responsive fire-  
362 follower, *Emmenanthe penduliflora*, also encodes two KAI2 proteins in its genome. EpKAI2a is  
363 similar to LsKAI2a in terms of the predicted volume and morphology of its ligand-binding pocket.  
364 By comparison, LsKAI2b and EpKAI2b are predicted to have substantially enlarged pockets and  
365 share similar amino acid substitutions at a small set of pocket positions. We hypothesize that  
366 EpKAI2b enables KAR<sub>1</sub> perception during seed germination of *E. penduliflora*, but this will require  
367 further investigation.

368

369 We investigated how LsKAI2b mediates sensitive and specific responses to KAR<sub>1</sub>. By comparing  
370 the amino acid sequences of known (i.e. LsKAI2b and ShKAI2i) and putative (i.e. EpKAI2b) KAR<sub>1</sub>-  
371 responsive proteins to evolutionarily conserved paralogs from the same species that do not confer  
372 KAR<sub>1</sub> responses (i.e. LsKAI2a, ShKAI2c, PaKAI2c, and putatively EpKAI2a), we surmised that

373 the pocket residues at positions 96, 124, 139, and 161 may influence ligand-specificity. We  
374 performed a broader comparison of KAI2 sequences from 199 asterids, including 173 eu-asterid  
375 (lamiids and campanulids) species and 26 outgroup species from the Ericales and Cornales. We  
376 found that the vast majority of sequences fall into two groups that are distinguished by the residue  
377 at position 124. The 173 asterid species comprise 115 lamiids; of these, 105 (91.3%) have a KAI2  
378 sequence with Y124, while 79 (68.7%) have a KAI2 with F124. Of 58 campanulid species, 57  
379 (98.3%) have a KAI2 sequence belonging to the Y124 group, but only 7 (12.1%) have a KAI2  
380 from the F124 group. Similarly, 100% of outgroup species are represented in the Y124 group, but  
381 only 2 outgroup species (8%) are represented in the F124 group. Amino acid identities at positions  
382 96, 139, 161, and 190 were also well conserved within each group, but different across the groups.  
383 Thus, consensus combinations of V96, Y124, L139, A161, and A190, or L96, F124, I139, V161,  
384 and F190 are observed among asterid KAI2 proteins. The residues at these positions may have  
385 co-evolved (Figure 6). We do not yet know whether these combinations of amino acids evolved  
386 convergently among KAI2 paralogs in distinct lineages, or whether F124-type KAI2 paralogs were  
387 lost on many occasions within the asterids. However, the unequal representation of lamiid,  
388 campanulid, and outgroup species in the F124 group is suggestive of one KAI2 duplication shared  
389 among Lamiids, with independent, smaller-scale duplications in the campanulids and Ericales.

390

### 391 **Pocket residues that influence ligand specificity of KAI2**

392 Many studies have used structural comparisons, molecular dynamics modeling, and *in vitro*  
393 biochemical assays to identify residues that may influence the ligand-specificities or affinities of  
394 KAI2 proteins, particularly with regard to SL perception (Nelson, 2021). Three recent studies,  
395 however, have examined how specific residues affect KAI2 ligand preferences *in vivo*. Unlike its  
396 relative in the Brassicaceae, *Arabidopsis thaliana*, the invasive, smoke-responsive species  
397 *Brassica tournefortii* is more sensitive to KAR<sub>1</sub> than KAR<sub>2</sub>. Three *KAI2* genes are present in the  
398 *B. tournefortii* genome, only two of which appear to encode functional proteins (Sun et al., 2020).  
399 *BtKAI2b* is the most highly expressed *KAI2* paralog in seeds and seedlings. A *BtKAI2b* transgene  
400 confers stronger responses to KAR<sub>1</sub> than KAR<sub>2</sub> when expressed in *Arabidopsis kai2*, whereas  
401 *BtKAI2a* confers stronger or similar responses to KAR<sub>2</sub> than KAR<sub>1</sub>. Swapping amino acid identities  
402 of *BtKAI2a* and *BtKAI2b* at positions 96 and 189 (per numbering in this study) switches their KAR  
403 preference *in vivo* and ability to respond to GR24<sup>ent-5DS</sup> *in vitro*. Of the two residues, position 96 is  
404 primarily responsible for determining KAR<sub>1</sub> versus KAR<sub>2</sub> preference. *BtKAI2c* has an unusual R96  
405 residue that makes the protein unstable (Sun et al., 2020). Its orthologs in other *Brassica* spp.,  
406 which have a combination of L96, F124, L139, and V161 residues, might mediate KL-specific



407 responses similar to AtKAI2<sup>LFLV</sup> (Figure S4). If so, perhaps the loss of BtKAI2c activity made *B.*  
408 *tournefortii* germination more dependent on external cues.

409

410 The legume *Lotus japonicus* also has two *KAI2* paralogs that show different ligand specificities.  
411 LjKAI2a responds similarly to KAR<sub>1</sub> and KAR<sub>2</sub>, and responds better to GR24<sup>ent-5DS</sup> than GR24<sup>5DS</sup>  
412 (Carbonnel et al., 2020b). By contrast, LjKAI2b responds to KAR<sub>1</sub>, has very little response to  
413 KAR<sub>2</sub>, and does not respond to either GR24<sup>5DS</sup> or GR24<sup>ent-5DS</sup>. Pocket residues at positions 157,  
414 160, 190, and 218 differ between LjKAI2a and LjKAI2b. An unusual Trp substitution for Phe at  
415 position 157 is primarily responsible for the reduced responses to GR24<sup>ent-5DS</sup> in LjKAI2b, although  
416 positions 160 and 190 may also contribute to a minor degree. The basis for different KAR  
417 responses has not yet been explored, or the role of position 218 (Carbonnel et al., 2020b). It is  
418 notable that LjKAI2a and LjKAI2b share V96, Y124, L139, A161 identities, and therefore would  
419 not have been anticipated to have different ligand specificities based upon our analysis.

420

421 A third study examined the basis of SL perception by KAI2d proteins from parasitic plants. A  
422 KAI2d paralog from *Striga hermonthica*, ShHTL7, confers exceptionally sensitive germination  
423 responses to SL when expressed in Arabidopsis (Toh et al., 2015). 92 variants of AtKAI2 were  
424 analyzed that had single, double, or triple substitutions for ShHTL7 residues at pocket positions  
425 26, 124, 142, 153, 157, 174, 190, and 194 (Arellano-Saab et al., 2021). The variant proteins that  
426 showed the strongest yeast two-hybrid interactions with a MAX2 fragment in the presence of *rac*-  
427 GR24 tended to have substitutions at positions 124, 157, or 190. In transgenic Arabidopsis lines,  
428 however, the strongest germination response to *rac*-GR24 was conferred by a variant with  
429 W153L, F157T, and G190T substitutions. This variant gained responsiveness to 2'*R*-configured  
430 GR24<sup>5DS</sup>, while retaining responses to KAR<sub>2</sub> and putatively KL (Arellano-Saab et al., 2021).

431

432 It seems likely that multiple combinations of pocket residues can produce similar ligand  
433 specificities in KAI2 proteins. For example, the KAR<sub>1</sub>-responsive proteins ShKAI2i and LsKAI2b  
434 differ from the consensus for F124-type KAI2 at position 139 (both are Val), and LsKAI2b also  
435 has M96 and A190 residues. We found that position 124 is an important determinant of KAR<sub>2</sub>  
436 responsiveness, but others showed that position 96 influences this (Sun et al., 2020). This poses  
437 challenges for forming a predictive model of KAI2 ligand-specificity based upon amino acid  
438 sequences alone. It also implies that there are multiple evolutionary paths to produce convergent  
439 outcomes for KAI2 signaling. Several positions in KAI2 may be hotspots for the diversification of  
440 ligand preferences. In particular, residues at positions 96, 124, 157, 160/161, and 189/190 have



441 been implicated in ligand selectivity by multiple studies (Sun et al., 2020; Carbonnel et al., 2020b;  
442 Arellano-Saab et al., 2021).

443

444 Potential benefits to agriculture may be achieved by understanding how to engineer KAI2 ligand  
445 preferences. KAI2 variants could be introduced to crops as transgenes, or endogenous KAI2  
446 genes could be altered *in situ* through CRISPR-Cas9-based technologies. This could then allow  
447 selective activation of KAI2 signaling, which controls diverse traits, through application of a  
448 synthetic KAI2 agonist. We were not able to fully recreate the ligand selectivity of LsKAI2b in  
449 AtKAI2. Although we succeeded in removing KAR<sub>2</sub> response while maintaining or enhancing  
450 KAR<sub>1</sub> response, *rac*-GR24 response remained intact. One possible cause is that we performed  
451 substitutions at positions 96, 124, 139, and 161 with the consensus residues for F124-type KAI2  
452 in asterids, which differ slightly from LsKAI2b identities.

453

#### 454 **Evolution of smoke-induced germination**

455 Several changes can be imagined to lead to the KAR<sub>1</sub>-dependent germination response observed  
456 in some fire followers. First, a KAR<sub>1</sub> receptor may evolve more robust signaling activity. This could  
457 occur through an increase in affinity for KAR<sub>1</sub> (or rather, a presumed KAR<sub>1</sub> metabolite).  
458 Alternatively, enhanced affinity of the receptor for its signaling partners upon activation may  
459 increase signal transduction. This appears to be the case for ShHTL7 (Wang et al., 2021).  
460 Although *ShHTL7* transgenic lines respond to picomolar SL, the micromolar affinity of ShHTL7  
461 for SL *in vitro* is comparable to other KAI2/HTL paralogs in *Striga hermonthica* (Toh et al., 2015;  
462 Tsuchiya et al., 2015; Wang et al., 2021). In contrast to other KAI2/HTL, ShHTL7 shows unusually  
463 high affinity for MAX2, which can be attributed to differences at five or fewer amino acids (Wang  
464 et al., 2021). It is unknown if ShHTL7 also has higher affinity for SMAX1 than other KAI2/HTL  
465 proteins. Second, increased expression of a KAR<sub>1</sub>-responsive receptor in seed may enable better  
466 germination responses to KAR<sub>1</sub>. As an example, we observed that *LsKAI2b* is more highly  
467 expressed than *LsKAI2a* in lettuce achenes (Figure 3). Similarly, the KAR<sub>1</sub>-preferring receptor  
468 *BtKAI2b* is more highly expressed in *B. tournefortii* seed than other *KAI2* paralogs (Sun et al.,  
469 2020). Third, if KARs are metabolized *in vivo* as hypothesized, increased expression or activity of  
470 an enzyme(s) involved in that process could increase the availability of bioactive signals that  
471 activate KAI2. Fourth, an increase in physiological dormancy may be required to make seed  
472 germination more strictly dependent upon KAI2 signaling. One way this might occur is through  
473 downregulation of gibberellin biosynthesis or signaling. Arabidopsis germination typically requires  
474 gibberellins, which counteract the dormancy-promoting effects of abscisic acid. However, loss of

475 SMAX1 through mutation or KAI2-SCF<sup>MAX2</sup> activity can bypass this requirement (Bunsick et al.,  
476 2020).

477

## 478 **MATERIALS & METHODS**

479

### 480 **Materials and plant propagation**

481 KAR<sub>1</sub>, KAR<sub>2</sub>, and *rac*-GR24 were synthesized and provided by Dr. Gavin Flematti and Dr. Adrian  
482 Scaffidi (University of Western Australia). Oligonucleotide primer sequences are described in  
483 Table S4. *Lactuca sativa* cv. Grand Rapids achenes were sourced from a commercial supplier  
484 (185C, Stokes Seeds). The *Arabidopsis thaliana* double mutant line *d14 htl-3* (here referred to as  
485 *d14 kai2*) was kindly provided by Dr. Peter McCourt (University of Toronto) and is previously  
486 described (Toh et al., 2014). *Arabidopsis thaliana* and *Emmenanthe penduliflora* plants were  
487 propagated in Sungro Professional Growing Mix under white light (~110  $\mu\text{mol m}^{-2} \text{s}^{-1}$ ; MaxLite  
488 LED T8 16.5W 4000k light-emitting diode bulbs) with 16 h light/8 h dark photoperiod at ~21–24°C.  
489 Soil was supplemented with Gnatrol WDG, Marathon (imidacloprid), and Osmocote 14–14–14  
490 fertilizer.

491

### 492 **Functional analysis of KAI2 genes from lettuce**

493 The two *KAI2* sequences from lettuce were obtained from the Lettuce Genome Resource (Reyes-  
494 Chin-Wo et al., 2017) through a TBLASTN search of the *L. sativa* genome (version 4) using the  
495 *Arabidopsis thaliana* KAI2 (AtKAI2) protein sequence as a query. Each predicted protein  
496 sequence from lettuce was then used as a query in a reciprocal TBLASTN search of *Arabidopsis*  
497 *thaliana* (Araport 11) transcripts (Berardini et al., 2015) to identify likely *AtKAI2* orthologs.  
498 Lsat\_1\_v4\_lg\_4\_361560640..361561729 was designated *LsKAI2a* and  
499 Lsat\_1\_v4\_lg\_4\_361607540..361608739 was designated *LsKAI2b*. Each *KAI2* paralog was  
500 amplified from lettuce genomic DNA using primers with Gateway attB adapters, and Gateway  
501 cloning was used to shuttle each paralog via an entry vector into a plant binary destination vector  
502 (pKAI2pro-GW) that expresses genes under the control of the *Arabidopsis* *KAI2* promoter (Waters  
503 et al., 2015). Constructs were transformed into *Agrobacterium tumefaciens* (GV3101 pMP90),  
504 and floral dip transformation of *Arabidopsis thaliana* was performed in 5% sucrose (w/v) with  
505 0.025% (v/v) Silwet-77 (Clough and Bent, 1998). Germination and hypocotyl assays were  
506 performed in a HiPoint DCI-700 LED Z4 growth chamber.

507

508

## 509 **Lettuce germination assays**

510 Two layers of Whatman #1 filter paper (7 cm) were soaked with 2.5 mL of a treatment solution in  
511 a Petri dish. All aqueous solutions of KAR<sub>1</sub>, KAR<sub>2</sub>, and *rac*-GR24 were freshly prepared from  
512 1000X stocks in acetone stored at -20°C. Approximately 50 lettuce achenes were plated onto each  
513 dish in the dark. Petri dishes were sealed with Parafilm and immediately placed into a growth  
514 chamber. Plates were incubated at 20°C for 60 min in dark, 10 min in far-red light (730 nm, 26  
515  $\mu\text{mol m}^{-2} \text{s}^{-1}$ ), and 47 h in dark. Germination was indicated by the emergence of a radicle.

## 517 **Gene expression analysis**

518 Lettuce achenes were plated and light-treated as described for germination assays. Achenes  
519 were collected after 6 h or 24 h of imbibition and flash-frozen in liquid nitrogen before storage at  
520 -80°C. RNA extraction was performed with Spectrum Plant Total RNA Kit (Sigma). DNase I (New  
521 England Biolabs) digestion to remove contaminating genomic DNA was performed after RNA  
522 extraction. RNA concentrations were measured using a Qubit RNA Broad-Range Assay Kit  
523 (Invitrogen) and fluorometer. First-strand cDNA synthesis was performed with the Verso cDNA  
524 Synthesis Kit (Thermo-Fisher) with random hexamer and anchored oligo dT primers. Real-time  
525 quantitative PCR was performed on cDNA with Luna Universal qPCR Mastermix (New England  
526 Biolabs) in a CFX384 thermal cycler (Bio-Rad). Amplification conditions were 95°C for 3 minutes,  
527 and 40 cycles of 95°C for 15 seconds and 60°C for 1 minute, followed by a melt-curve analysis.  
528 *Arabidopsis thaliana* seedlings were grown as described for hypocotyl elongation assays and  
529 harvested at 5 days old. Gene expression analysis was performed as described for lettuce, except  
530 an On-Column DNase I Digestion kit (Sigma) was used during RNA extraction.

## 532 **Phylogenetic analysis of *KAI2***

533 The two *KAI2* sequences from lettuce were obtained as described above. Additional *KAI2*  
534 sequences from plant species representing the diversity of dicots, with *Physcomitrium*  
535 (*Physcomitrella*) *patens* as an outgroup, were collected from prior publications (Conn et al., 2015;  
536 Tsuchiya et al., 2015; Lopez-Obando et al., 2016; Yoshida et al., 2019). In total, 176 sequences  
537 from 56 species were combined, aligned, and manually adjusted with respect to predicted amino  
538 acid sequence. The nucleotide alignment was trimmed at the 5' and 3' ends to minimize gaps and  
539 regions of ambiguous alignment. Relative to the *AtKAI2* coding sequence, the final alignment  
540 retained codons 7 - 266 and consisted of 819 characters. The alignment was used to generate a  
541 Bayesian phylogeny in MrBayes v3.2.5 (Ronquist and Huelsenbeck 2003) (Ronquist and  
542 Huelsenbeck, 2003) as previously described (Conn et al., 2015)

543

#### 544 **Hypocotyl Assays**

545 Seeds were surface-sterilized (5 min in 70% EtOH with 0.05% (v/v) Triton X-100, followed by 70%  
546 and 95% EtOH washes, and air drying) and plated on 0.5x Murashige-Skoog (MS) Medium with  
547 MES Buffer and Vitamins (Research Products International), pH 5.7, solidified with 0.8% (w/v)  
548 Bacto agar (BD) supplemented with 0.1% (v/v) acetone or 1  $\mu$ M KAR<sub>1</sub>, KAR<sub>2</sub>, or *rac*-GR24. Plates  
549 were stratified 3 d in dark at 4°C, then incubated in a growth chamber at 21°C for 3 h in white light  
550 ( $\sim$ 150  $\mu$ mol m<sup>-2</sup> s<sup>-1</sup>), 21 h darkness, and 4 d red light (660 nm, 30  $\mu$ mol m<sup>-2</sup> s<sup>-1</sup>). Seedlings were  
551 photographed and then hypocotyl lengths were measured using ImageJ (NIH).

552

#### 553 **Structural Modeling and Analyses**

554 Homology models of LsKAI2A, LsKAI2b, EpKAI2a, and EpKAI2b structures were generated with  
555 Phyre2 using ShKAI2iB (PDB structure 5DNW) as a template (Kelley et al., 2015; Xu et al., 2016).  
556 Structural illustrations were generated using PyMOL. Pocket volume and solvent accessible  
557 surface area were determined via CASTp (Dundas et al., 2006). Residues defining the pocket  
558 were broadly identified via CASTp and then probed for position and conservation to identify a final  
559 pocket-defining residue list to examine for all species.

560

#### 561 ***Emmenanthe penduliflora* transcriptome Assembly**

562 RNA was extracted from 7-d-old *Emmenanthe penduliflora* seedlings grown in 16:8 photoperiod  
563 on moistened filter paper using Spectrum Plant Total RNA kit (Sigma-Aldrich) after removal of  
564 seed coats. Library preparation was performed with 1000 ng of RNA input using NEB Ultra II  
565 Directional RNA kit with mRNA isolation. Sequencing was performed on a Nextseq 500 instrument  
566 with NextSeq mid-output 2x75 kit (paired-end 75 bp reads), producing 38.4 M reads ( $\sim$ 5.8 Gbp).  
567 The raw RNA-seq reads are available in NCBI Sequence Read Archive SRR16264938. A *de novo*  
568 transcriptome was assembled from paired-end reads with Trinity 2.6.6 (Grabherr et al., 2011) ran  
569 with the "--no\_bowtie" parameter. Putative homologs of *KAI2* in *E. penduliflora* were identified by  
570 querying *AtKAI2* against the transcriptome assembly in a custom BLAST search and validated by  
571 reciprocal BLAST. *EpKAI2a* and *EpKAI2b* coding sequences are provided in Table S1.

572

#### 573 **Analysis of KAI2 evolution in asterids**

574 A reciprocal BLAST strategy was used to conservatively identify KAI2 orthologs. An *AtKAI2* query  
575 was used in a BLASTP search of asterids in The 1,000 Plants Project Database (v5)  
576 (<https://db.cngb.org/onekp/>) (Carpenter et al., 2019; One Thousand Plant Transcriptomes

577 Initiative, 2019). The 1000 best BLASTP hits were used in reciprocal BLASTP comparisons to  
578 Arabidopsis KAI2, D14, and DLK2. 164 BLAST matches with a match length less than 230 aa  
579 were filtered out as incompletely assembled genes or pseudogenes. 21 proteins that had  
580 potentially ambiguous orthology based on a difference of less than 50 in BLASTP bit scores  
581 between the first and second best hits to Arabidopsis proteins were also removed. Two KAI2 from  
582 a “*Mydocarpus* sp.”, presumably mislabeled, were removed. The remaining 813 asterid proteins  
583 were composed of 352 KAI2, 257 D14, and 204 DLK2. Multiple transcriptome assemblies were  
584 present for some species. 18 duplicates of KAI2 sequences from the same species were  
585 removed, leaving 334 KAI2 from 199 species. KAI2 were classified as Y124- or F124-type based  
586 upon the presence of an Ser-Pro-Arg-Tyr or Ser-Pro-Arg-Phe motif, which is highly conserved  
587 and bridges the intron splice junction. Only 12 proteins did not meet this criteria, and in some  
588 cases may be pseudogenes or incorrectly assembled. Asterid KAI2 protein sequences are  
589 provided in Table S2. Multiple sequence alignments of KAI2 proteins were performed in MEGA X  
590 and frequency plots of consensus sequences at pocket positions were visualized with WebLogo  
591 (Crooks et al., 2004; Kumar et al., 2018).

592

### 593 **AtKAI2 variant generation and analysis**

594 A binary plant transformation plasmid expressing an *AtKAI2* coding sequence under control of an  
595 *AtKAI2* promoter (*pKAI2pro-AtKAI2*) was modified (Waters et al., 2015). A set of five  
596 oligonucleotides ranging from 41 to 56 nt in length (Table S4) were designed to span a central  
597 portion of the *AtKAI2* sequence encoding amino acids 96, 124, 139, and 161 when ligated end-  
598 to-end. Wildtype and mutant versions of the oligonucleotides were synthesized and  
599 phosphorylated with T4 polynucleotide kinase. Different combinations of wt and mutant  
600 phosphorylated oligonucleotides were annealed to four bridging oligonucleotides that were each  
601 complementary to the ends of two phosphorylated oligonucleotides. T4 DNA ligase was used to  
602 join the adjacent phosphorylated oligonucleotides into a continuous single strand of DNA. The  
603 new strand was amplified with Phusion high-fidelity DNA polymerase and inserted through Gibson  
604 assembly (New England Biolabs) into *pKAI2pro-AtKAI2* that had first been linearized by PCR to  
605 drop out the central region being swapped and digested with DpnI to remove un-linearized,  
606 methylated plasmid from the reaction. Sanger-sequence-verified *pKAI2pro-AtKAI2* variant  
607 plasmids were introduced into the *d14 kai2* mutant background via floral dip transformation.  
608 Transformants were selected at the seedling stage with hygromycin. Lines with single T-DNA  
609 insertion events were brought to homozygosity and characterized.

610

611 **Statistical analysis**

612 Statistical analysis was performed in Prism 9 (GraphPad). Post-hoc statistical comparisons were  
613 performed after ANOVA or two-way ANOVA. Box plots show the median, 25th percentile, and  
614 75th percentile. Tukey whiskers on box plots extend 1.5 times the interquartile range beyond the  
615 25th/75th percentile up to the minimum/maximum value in the data set. Outlier data beyond Tukey  
616 whiskers are shown as individual points.

617

618 **ACKNOWLEDGMENTS**

619 We thank Dr. Gavin Flematti and Dr. Adrian Scaffidi (University of Western of Australia) for  
620 providing KAR<sub>1</sub>, KAR<sub>2</sub>, and *rac*-GR24; Dr. Winslow Briggs (Carnegie Institution for Science) for  
621 providing *Emmenanthe penduliflora* seed; and Elise Landsbergen for extraction of RNA from *E.*  
622 *penduliflora*. RNA-seq library preparation and sequencing was performed by the Genomics Core  
623 at University of California, Riverside (UCR) and *de novo* transcriptome assembly was performed  
624 on the High Performance Computer Cluster at UCR. Funding was provided by the National  
625 Science Foundation (NSF-IOS 1856741 to DCN; NSF-CAREER 2047396 and NSF-EAGER  
626 2028283 to NS; NSF-CAREER 2046256 to DK; and NSF Research Traineeship (NRT) Program  
627 Grant DGE-1922642 “Plants3D” to SM) and the United State Department of Agriculture (NIFA  
628 Award 2017-38422-27135 to SM; Hatch project CA-R-BPS-5209-H to DCN; and Hatch project  
629 CA-R-BPS-5154-H to DK).

630

631 **Disclosure Statement**

632 N.S. has an equity interest in OerthBio-LLC and serves on the company’s Scientific Advisory  
633 Board.



634 **FIGURE LEGENDS**

635

636 **Figure 1. Lettuce achenes are highly sensitive to KAR<sub>1</sub>.**

637 A) Structures of KAR<sub>1</sub>, KAR<sub>2</sub>, GR24<sup>ent-5DS</sup>, and GR24<sup>5DS</sup>. GR24<sup>5DS</sup> is a strigolactone analog that  
638 mimics the stereochemical configuration of the SL 5-deoxystrigol. GR24<sup>ent-5DS</sup> is an enantiomer of  
639 GR24<sup>5DS</sup> that has a methylbutenolide D-ring in 2'S configuration, which is not found in natural  
640 SLs. B) Lettuce germination in the presence of 0.1% (v/v) acetone or 1 μM KAR<sub>1</sub>, KAR<sub>2</sub>, or *rac*-  
641 GR24. Achenes were incubated 1 h in darkness, followed by a pulse of far-red light for 10 minutes,  
642 and the remaining 48 h in darkness at 20°C. n=4 replicates of approximately 50-70 achenes each;  
643 mean ± SD. C) Lettuce germination in the presence of a range of KAR<sub>1</sub> and KAR<sub>2</sub> concentrations  
644 after 1 h in darkness, followed by a pulse of far-red light for 10 minutes, and the remaining 48 h  
645 in darkness at 20°C. n=3 replicates of approximately 50-60 achenes each. D) qRT-PCR analysis  
646 of *LsDLK2* expression relative to *LsACT* (actin) in lettuce achenes imbibed with 0.1% (v/v) acetone  
647 or 1 μM KAR<sub>1</sub>, KAR<sub>2</sub>, or *rac*-GR24 for 24 h in darkness at 20°C. n=4 pools of achenes; mean ±  
648 SD. Values re-scaled to relative *LsDLK2* expression in mock-treated achenes.

649

650 **Figure 2. Lettuce *KAI2* genes group with the conserved *KAI2c* clade.**

651 Bayesian phylogeny of *KAI2* genes in dicots. Sequences from lamiids fall into the conserved  
652 (*KAI2c*, red), intermediate (*KAI2i*, blue), and divergent (*KAI2d*, purple; parasite-specific) clades  
653 that were previously described (Conn et al., 2015).

654

655 **Figure 3. *LsKAI2b* transcripts are more abundant than *LsKAI2a* during early imbibition.**

656 qRT-PCR analysis of *LsKAI2a* and *LsKAI2b* expression relative to *LsACT* in lettuce achenes that  
657 were un-imbibed (dry), or imbibed in water for 1 h in darkness, followed by 10 min in far-red light,  
658 and the remaining time to 6 or 24 h in darkness at 20°C. n=4 pools of achenes; mean ± SD.

659

660 **Figure 4. An *LsKAI2b* transgene confers strong KAR<sub>1</sub> responses to Arabidopsis seedlings.**

661 Hypocotyl length of 5-d-old *Arabidopsis thaliana* seedlings grown under red light on 0.5x MS  
662 media supplemented with 0.1% (v/v) acetone or 1 μM KAR<sub>1</sub>, KAR<sub>2</sub>, or *rac*-GR24. n=20 seedlings.  
663 Box plots indicate median and quartiles with Tukey's whiskers. Gray dots indicate outlier data  
664 beyond Tukey's whiskers. \*, p<0.01, Dunnett's multiple comparisons test, treatment versus mock  
665 comparison within each line. #, p<0.01, Dunnett's multiple comparisons test, comparison to *d14*  
666 *kai2*, mock-treated samples only.

667

668 **Figure 5. KAI2b proteins in lettuce and *E. penduliflora* have enlarged ligand-binding**  
669 **pockets.**

670 Homology models of A) LsKAI2a, B) LsKAI2b, C) EpKAI2a, and D) EpKAI2b. Hydrophobic  
671 cavities and their volumes are shown. Pocket residues that differ between KAI2a and KAI2b in  
672 each species are indicated.

673

674 **Figure 6. Two groups of asterid KAI2 have conserved differences at five pocket positions.**

675 A) Distribution of KAI2 types in asterids. Phylogeny adapted from Angiosperm Phylogeny Group  
676 (APG) IV system (Chase et al., 2016). Pie charts indicate the proportion of species for which only  
677 Y124-type KAI2 (blue), only F124-type KAI2 (red), or both Y124-type and F124-type KAI2  
678 (orange) were observed in *de novo* transcriptome assemblies from OneKP. The area of each pie  
679 chart is proportional to the number of species that were sampled from each order, from n=1 for  
680 Icacinales to n=60 for Lamiales. B) Frequency plots of amino acid composition in asterid KAI2  
681 proteins at 30 positions that form the ligand-binding pocket. Asterid KAI2 proteins were split into  
682 two groups based upon Tyr or Phe amino acid identity at position 124. Dots above residues  
683 indicate candidates for ligand specificity-determining residues based upon amino acid  
684 conservation within and across the two groups. Blue dots indicate prioritized candidate positions.  
685 Position 190 was de-prioritized because LsKAI2b does not have a Phe190 residue but is sensitive  
686 to KAR<sub>1</sub> nonetheless.

687

688 **Figure 7. Pocket residues at positions 96, 124, 139, and 161 affect AtKAI2 ligand-specificity.**

689 Inhibition of hypocotyl elongation by KAR<sub>1</sub>, KAR<sub>2</sub>, or *rac*-GR24 in 5-d-old seedlings grown in red  
690 light for transgenic lines of *AtKAI2* variants with A) quadruple- and triple-, or B) double- and  
691 single-substitutions. All transgenic lines are in the *d14 kai2* double mutant background. Data are  
692 derived from hypocotyl length measurements shown in Figure S4. Each data point represents  
693 growth inhibition for a unique genetic line. Gray points indicate data that were not significantly  
694 different from mock-treated controls for each transgenic line.

695

696 **Figure S1. Transgene expression levels and KAR<sub>1</sub> sensitivity in lettuce KAI2 transgenic**  
697 **lines.**

698 A) qRT-PCR analysis of *AtKAI2*, *LsKAI2a*, and *LsKAI2b* expression, or B) *DLK2* expression  
699 relative to *CACS* in 5-d-old Arabidopsis seedlings grown under red light. n=3 pools of seedlings;  
700 mean ± SD. B) Hypocotyl length of 5-d-old Arabidopsis seedlings grown under red light in the  
701 presence of 1 nM to 1000 nM KAR<sub>1</sub>. Percent growth inhibition relative to mock-treated control

702 within genotype is indicated below each treatment boxplot. \*,  $p < 0.01$ , Dunnett's multiple  
703 comparisons test, treatment versus mock comparison within each line.

704

705 **Figure S2. Comparisons of lettuce and *E. penduliflora* KAI2 structures within and across**  
706 **species.**

707 Overlaid homology models comparing A) LsKAI2a and LsKAI2b, B) EpKAI2a and EpKAI2b, C)  
708 LsKAI2a and EpKAI2a, and D) LsKAI2b and EpKAI2b. Hydrophobic cavities are shown with  
709 residues highlighted in Figure 6 as sticks. RMSD values are shown for each pair of models.

710

711 **Figure S3. Sequence comparison of several characterized KAI2 proteins.**

712 Multiple sequence alignment by Clustal Omega of KAI2 proteins from *Arabidopsis thaliana*,  
713 *Phelipanche aegyptiaca*, *Striga hermonthica*, *Lactuca sativa*, and *Emmenanthe penduliflora*.

714 ShKAI2i and LsKAI2b show selective responses to KAR<sub>1</sub>, and EpKAI2b is hypothesized to have  
715 similar properties. Pocket residues that were different between either LsKAI2a and LsKAI2b, or  
716 EpKAI2 and EpKAI2b are highlighted in boxes.

717

718 **Figure S4. Hypocotyl elongation responses to KARs and *rac*-GR24 conferred by AtKAI2**  
719 **variants.**

720 Hypocotyl lengths of 5-d-old *Arabidopsis* seedlings grown in red light in the presence of 0.1% (v/v)  
721 acetone or 1  $\mu$ M KAR<sub>1</sub>, KAR<sub>2</sub>, or *rac*-GR24. Transgenic lines carry *AtKAI2* variants with A)  
722 quadruple- and triple-, or B) double- and single-substitutions at positions 96, 124, 139, and 161.  
723 All transgenic lines are in the *d14 kai2* double mutant background. n=20 (transgenics) or 40  
724 seedlings (wt and *d14 kai2*) for A) and n=20 seedlings for B). Box plots indicate median and  
725 quartiles with Tukey's whiskers. Gray dots indicate outlier data beyond Tukey's whiskers. \*,  
726  $p < 0.01$ , Dunnett's multiple comparisons test, treatment versus mock comparison within each line.

727 Growth inhibition responses to KAR and *rac*-GR24 treatments are summarized in Figure 7.

728 **REFERENCES**

- 729
- 730 **Agusti J, Herold S, Schwarz M, Sanchez P, Ljung K, Dun EA, Brewer PB, Beveridge CA,**  
731 **Sieberer T, Sehr EM, et al** (2011) Strigolactone signaling is required for auxin-dependent  
732 stimulation of secondary growth in plants. *Proc Natl Acad Sci U S A* **108**: 20242–20247
- 733 **Akiyama K, Matsuzaki K-I, Hayashi H** (2005) Plant sesquiterpenes induce hyphal branching in  
734 arbuscular mycorrhizal fungi. *Nature* **435**: 824–827
- 735 **Al-Babili S, Bouwmeester HJ** (2015) Strigolactones, a novel carotenoid-derived plant  
736 hormone. *Annu Rev Plant Biol* **66**: 161–186
- 737 **Arellano-Saab A, Bunsick M, Al Galib H, Zhao W, Schuetz S, Bradley JM, Xu Z, Adityani C,**  
738 **Subha A, McKay H, et al** (2021) Three mutations repurpose a plant karrikin receptor to a  
739 strigolactone receptor. *Proc Natl Acad Sci U S A*. doi: 10.1073/pnas.2103175118
- 740 **Berardini TZ, Reiser L, Li D, Mezheritsky Y, Muller R, Strait E, Huala E** (2015) The  
741 Arabidopsis information resource: Making and mining the “gold standard” annotated  
742 reference plant genome. *Genesis* **53**: 474–485
- 743 **Bouwmeester H, Li C, Thiombiano B, Rahimi M, Dong L** (2021) Adaptation of the parasitic  
744 plant lifecycle: germination is controlled by essential host signaling molecules. *Plant Physiol*  
745 **185**: 1292–1308
- 746 **Bunsick M, Toh S, Wong C, Xu Z, Ly G, McErlean CSP, Pescetto G, Nemrsh KE, Sung P,**  
747 **Li JD, et al** (2020) SMAX1-dependent seed germination bypasses GA signalling in  
748 Arabidopsis and Striga. *Nat Plants* **6**: 646–652
- 749 **Burger BV, Pošta M, Light ME, Kulkarni MG, Viviers MZ, Van Staden J** (2018) More  
750 butenolides from plant-derived smoke with germination inhibitory activity against  
751 karrikinolide. *S Afr J Bot* **115**: 256–263
- 752 **Bürger M, Mashiguchi K, Lee HJ, Nakano M, Takemoto K, Seto Y, Yamaguchi S, Chory J**  
753 (2019) Structural Basis of Karrikin and Non-natural Strigolactone Perception in  
754 *Physcomitrella patens*. *Cell Rep* **26**: 855–865.e5
- 755 **Bythell-Douglas R, Rothfels CJ, Stevenson DWD, Graham SW, Wong GK-S, Nelson DC,**  
756 **Bennett T** (2017) Evolution of strigolactone receptors by gradual neo-functionalization of  
757 KAI2 paralogues. *BMC Biol* **15**: 52
- 758 **Carbonnel S, Das D, Varshney K, Kolodziej MC, Villaécija-Aguilar JA, Gutjahr C** (2020a)  
759 The karrikin signaling regulator SMAX1 controls *Lotus japonicus* root and root hair  
760 development by suppressing ethylene biosynthesis. *Proc Natl Acad Sci U S A* **117**: 21757–  
761 21765
- 762 **Carbonnel S, Torabi S, Griesmann M, Bleek E, Tang Y, Buchka S, Basso V, Shindo M,**  
763 **Boyer F-D, Wang TL, et al** (2020b) *Lotus japonicus* karrikin receptors display divergent  
764 ligand-binding specificities and organ-dependent redundancy. *PLoS Genet* **16**: e1009249
- 765 **Carpenter EJ, Matasci N, Ayyampalayam S, Wu S, Sun J, Yu J, Jimenez Vieira FR, Bowler**  
766 **C, Dorrell RG, Gitzendanner MA, et al** (2019) Access to RNA-sequencing data from 1,173  
767 plant species: The 1000 Plant transcriptomes initiative (1KP). *Gigascience*. doi:  
768 10.1093/gigascience/giz126

- 769 **Chase MW, Christenhusz MJM, Fay MF** (2016) An update of the Angiosperm Phylogeny  
770 Group classification for the orders and families of flowering plants: APG IV. *Botanical*  
771 *Journal of*
- 772 **Choi J, Lee T, Cho J, Servante EK, Pucker B, Summers W, Bowden S, Rahimi M, An K, An**  
773 **G, et al** (2020) The negative regulator SMAX1 controls mycorrhizal symbiosis and  
774 strigolactone biosynthesis in rice. *Nat Commun* **11**: 2114
- 775 **Conn CE, Bythell-Douglas R, Neumann D, Yoshida S, Whittington B, Westwood JH,**  
776 **Shirasu K, Bond CS, Dyer KA, Nelson DC** (2015) PLANT EVOLUTION. Convergent  
777 evolution of strigolactone perception enabled host detection in parasitic plants. *Science*  
778 **349**: 540–543
- 779 **Conn CE, Nelson DC** (2015) Evidence that KARRIKIN-INSENSITIVE2 (KAI2) Receptors may  
780 Perceive an Unknown Signal that is not Karrikin or Strigolactone. *Front Plant Sci* **6**: 1219
- 781 **Crooks GE, Hon G, Chandonia J-M, Brenner SE** (2004) WebLogo: a sequence logo  
782 generator. *Genome Res* **14**: 1188–1190
- 783 **Dundas J, Ouyang Z, Tseng J, Binkowski A, Turpaz Y, Liang J** (2006) CASTp: computed  
784 atlas of surface topography of proteins with structural and topographical mapping of  
785 functionally annotated residues. *Nucleic Acids Res* **34**: W116–8
- 786 **Flematti GR, Ghisalberti EL, Dixon KW, Trengove RD** (2004) A compound from smoke that  
787 promotes seed germination. *Science* **305**: 977
- 788 **Flematti GR, Ghisalberti EL, Dixon KW, Trengove RD** (2009) Identification of alkyl  
789 substituted 2H-furo[2,3-c]pyran-2-ones as germination stimulants present in smoke. *J Agric*  
790 *Food Chem* **57**: 9475–9480
- 791 **Flematti GR, Goddard-Borger ED, Merritt DJ, Ghisalberti EL, Dixon KW, Trengove RD**  
792 (2007) Preparation of 2H-furo[2,3-c]pyran-2-one derivatives and evaluation of their  
793 germination-promoting activity. *J Agric Food Chem* **55**: 2189–2194
- 794 **Flematti GR, Merritt DJ, Piggott MJ, Trengove RD, Smith SM, Dixon KW, Ghisalberti EL**  
795 (2011) Burning vegetation produces cyanohydrins that liberate cyanide and stimulate seed  
796 germination. *Nat Commun* **2**: 360
- 797 **Gomez-Roldan V, Feras S, Brewer PB, Puech-Pagès V, Dun EA, Pillot J-P, Letisse F,**  
798 **Matusova R, Danoun S, Portais J-C, et al** (2008) Strigolactone inhibition of shoot  
799 branching. *Nature* **455**: 189–194
- 800 **Grabherr MG, Haas BJ, Yassour M, Levin JZ, Thompson DA, Amit I, Adiconis X, Fan L,**  
801 **Raychowdhury R, Zeng Q, et al** (2011) Full-length transcriptome assembly from RNA-Seq  
802 data without a reference genome. *Nat Biotechnol* **29**: 644–652
- 803 **Guo Y, Zheng Z, La Clair JJ, Chory J, Noel JP** (2013) Smoke-derived karrikin perception by  
804 the  $\alpha/\beta$ -hydrolase KAI2 from Arabidopsis. *Proc Natl Acad Sci U S A* **110**: 8284–8289
- 805 **Gutjahr C, Gobbato E, Choi J, Riemann M, Johnston MG, Summers W, Carbonnel S,**  
806 **Mansfield C, Yang S-Y, Nadal M, et al** (2015) Rice perception of symbiotic arbuscular  
807 mycorrhizal fungi requires the karrikin receptor complex. *Science* **350**: 1521–1524

- 808 **Hamiaux C, Drummond RSM, Janssen BJ, Ledger SE, Cooney JM, Newcomb RD,**  
809 **Snowden KC** (2012) DAD2 is an  $\alpha/\beta$  hydrolase likely to be involved in the perception of the  
810 plant branching hormone, strigolactone. *Curr Biol* **22**: 2032–2036
- 811 **Jiang L, Liu X, Xiong G, Liu H, Chen F, Wang L, Meng X, Liu G, Yu H, Yuan Y, et al** (2013)  
812 DWARF 53 acts as a repressor of strigolactone signalling in rice. *Nature* **504**: 401–405
- 813 **Kagiyama M, Hirano Y, Mori T, Kim S-Y, Kyozuka J, Seto Y, Yamaguchi S, Hakoshima T**  
814 (2013) Structures of D14 and D14L in the strigolactone and karrikin signaling pathways.  
815 *Genes Cells* **18**: 147–160
- 816 **Keeley JE, Fotheringham CJ** (1997) Trace gas emissions and smoke-induced seed  
817 germination. *Science*
- 818 **Keeley JE, Pausas JG** (2018) Evolution of “smoke” induced seed germination in pyroendemic  
819 plants. *South African Journal of Botany* **115**: 251–255
- 820 **Kelley LA, Mezulis S, Yates CM, Wass MN, Sternberg MJE** (2015) The Phyre2 web portal for  
821 protein modeling, prediction and analysis. *Nat Protoc* **10**: 845–858
- 822 **Khosla A, Morffy N, Li Q, Faure L, Chang SH, Yao J, Zheng J, Cai ML, Stanga JP, Flematti**  
823 **GR, et al** (2020) Structure-Function Analysis of SMAX1 Reveals Domains that Mediate its  
824 Karrikin-Induced Proteolysis and Interaction with the Receptor KAI2. *The Plant Cell*  
825 tpc.00752.2019
- 826 **Kochanek J, Long RL, Lisle AT, Flematti GR** (2016) Karrikins Identified in Biochars Indicate  
827 Post-Fire Chemical Cues Can Influence Community Diversity and Plant Development.  
828 *PLoS One* **11**: e0161234
- 829 **Kumar S, Stecher G, Li M, Knyaz C, Tamura K** (2018) MEGA X: Molecular Evolutionary  
830 Genetics Analysis across Computing Platforms. *Mol Biol Evol* **35**: 1547–1549
- 831 **Lee I, Kim K, Lee S, Lee S, Hwang E** (2018) Functional Analysis of a Missense Allele of  
832 KARRIKIN-INSENSITIVE2 that Impairs Ligand-Binding and Downstream Signaling in  
833 *Arabidopsis thaliana*. *Journal of*
- 834 **Liang Y, Ward S, Li P, Bennett T, Leyser O** (2016) SMAX1-LIKE7 Signals from the Nucleus to  
835 Regulate Shoot Development in *Arabidopsis* via Partially EAR Motif-Independent  
836 Mechanisms. *Plant Cell* **28**: 1581–1601
- 837 **Light ME, Burger BV, Staerk D, Kohout L, Van Staden J** (2010) Butenolides from plant-  
838 derived smoke: natural plant-growth regulators with antagonistic actions on seed  
839 germination. *J Nat Prod* **73**: 267–269
- 840 **Liu J, Cheng X, Liu P, Sun J** (2017) miR156-Targeted SBP-Box Transcription Factors Interact  
841 with DWARF53 to Regulate TEOSINTE BRANCHED1 and BARREN STALK1 Expression  
842 in Bread Wheat. *Plant Physiol* **174**: 1931–1948
- 843 **Li W, Nguyen KH, Chu HD, Van Ha C, Watanabe Y, Osakabe Y, Leyva-González MA, Sato**  
844 **M, Toyooka K, Voges L, et al** (2017) The karrikin receptor KAI2 promotes drought  
845 resistance in *Arabidopsis thaliana*. *PLoS Genet* **13**: e1007076
- 846 **Li W, Nguyen KH, Chu HD, Watanabe Y, Osakabe Y, Sato M, Toyooka K, Seo M, Tian L,**



- 847 **Tian C, et al** (2020) Comparative functional analyses of DWARF14 and KARRIKIN  
848 INSENSITIVE 2 in drought adaptation of *Arabidopsis thaliana*. *Plant J* **103**: 111–127
- 849 **Lopez-Obando M, Conn CE, Hoffmann B, Bythell-Douglas R, Nelson DC, Rameau C,**  
850 **Bonhomme S** (2016) Structural modelling and transcriptional responses highlight a clade  
851 of PpKAI2-LIKE genes as candidate receptors for strigolactones in *Physcomitrella patens*.  
852 *Planta* **243**: 1441–1453
- 853 **Nelson DC** (2021) The mechanism of host-induced germination in root parasitic plants. *Plant*  
854 *Physiol* **185**: 1353–1373
- 855 **Nelson DC, Flematti GR, Ghisalberti EL, Dixon KW, Smith SM** (2012) Regulation of seed  
856 germination and seedling growth by chemical signals from burning vegetation. *Annu Rev*  
857 *Plant Biol* **63**: 107–130
- 858 **Nelson DC, Flematti GR, Riseborough J-A, Ghisalberti EL, Dixon KW, Smith SM** (2010)  
859 Karrikins enhance light responses during germination and seedling development in  
860 *Arabidopsis thaliana*. *Proc Natl Acad Sci U S A* **107**: 7095–7100
- 861 **Nelson DC, Riseborough J-A, Flematti GR, Stevens J, Ghisalberti EL, Dixon KW, Smith**  
862 **SM** (2009) Karrikins discovered in smoke trigger *Arabidopsis* seed germination by a  
863 mechanism requiring gibberellic acid synthesis and light. *Plant Physiol* **149**: 863–873
- 864 **Nelson DC, Scaffidi A, Dun EA, Waters MT, Flematti GR, Dixon KW, Beveridge CA,**  
865 **Ghisalberti EL, Smith SM** (2011) F-box protein MAX2 has dual roles in karrikin and  
866 strigolactone signaling in *Arabidopsis thaliana*. *Proc Natl Acad Sci U S A* **108**: 8897–8902
- 867 **One Thousand Plant Transcriptomes Initiative** (2019) One thousand plant transcriptomes  
868 and the phylogenomics of green plants. *Nature* **574**: 679–685
- 869 **Reyes-Chin-Wo S, Wang Z, Yang X, Kozik A, Arikrit S, Song C, Xia L, Froenicke L, Lavelle**  
870 **DO, Truco M-J, et al** (2017) Genome assembly with in vitro proximity ligation data and  
871 whole-genome triplication in lettuce. *Nat Commun* **8**: 14953
- 872 **Ronquist F, Huelsenbeck JP** (2003) MrBayes 3: Bayesian phylogenetic inference under mixed  
873 models. *Bioinformatics* **19**: 1572–1574
- 874 **de Saint Germain A, Clavé G, Badet-Denisot M-A, Pillot J-P, Cornu D, Le Caer J-P, Burger**  
875 **M, Pelissier F, Retailleau P, Turnbull C, et al** (2016) An histidine covalent receptor and  
876 butenolide complex mediates strigolactone perception. *Nat Chem Biol* **12**: 787–794
- 877 **de Saint Germain A, Jacobs A, Brun G, Pouvreau J-B, Braem L, Cornu D, Clavé G, Baudu**  
878 **E, Steinmetz V, Servajean V, et al** (2021) A *Phelipanche ramosa* KAI2 protein perceives  
879 strigolactones and isothiocyanates enzymatically. *Plant Communications* **2**: 100166
- 880 **Scaffidi A, Waters MT, Sun YK, Skelton BW, Dixon KW, Ghisalberti EL, Flematti GR,**  
881 **Smith SM** (2014) Strigolactone Hormones and Their Stereoisomers Signal through Two  
882 Related Receptor Proteins to Induce Different Physiological Responses in *Arabidopsis*.  
883 *Plant Physiol* **165**: 1221–1232
- 884 **Shah FA, Wei X, Wang Q, Liu W, Wang D, Yao Y, Hu H, Chen X, Huang S, Hou J, et al**  
885 (2020) Karrikin Improves Osmotic and Salt Stress Tolerance via the Regulation of the

- 886 Redox Homeostasis in the Oil Plant *Sapium sebiferum*. *Front Plant Sci* **11**: 216
- 887 **Song X, Lu Z, Yu H, Shao G, Xiong J, Meng X, Jing Y, Liu G, Xiong G, Duan J, et al** (2017)  
888 IPA1 functions as a downstream transcription factor repressed by D53 in strigolactone  
889 signaling in rice. *Cell Res* **27**: 1128–1141
- 890 **Soundappan I, Bennett T, Morffy N, Liang Y, Stanga JP, Abbas A, Leyser O, Nelson DC**  
891 (2015) SMAX1-LIKE/D53 Family Members Enable Distinct MAX2-Dependent Responses to  
892 Strigolactones and Karrikins in *Arabidopsis*. *Plant Cell* **27**: 3143–3159
- 893 **van Staden J, Jäger AK, Light ME, Burger BV, Brown NAC, Thomas TH** (2004) Isolation of  
894 the major germination cue from plant-derived smoke. *S Afr J Bot* **70**: 654–659
- 895 **Stanga JP, Morffy N, Nelson DC** (2016) Functional redundancy in the control of seedling  
896 growth by the karrikin signaling pathway. *Planta* **243**: 1397–1406
- 897 **Stanga JP, Smith SM, Briggs WR, Nelson DC** (2013) SUPPRESSOR OF MORE AXILLARY  
898 GROWTH2 1 controls seed germination and seedling development in *Arabidopsis*. *Plant*  
899 *Physiol* **163**: 318–330
- 900 **Sun YK, Flematti GR, Smith SM, Waters MT** (2016) Reporter Gene-Facilitated Detection of  
901 Compounds in *Arabidopsis* Leaf Extracts that Activate the Karrikin Signaling Pathway.  
902 *Front Plant Sci* **7**: 1799
- 903 **Sun YK, Yao J, Scaffidi A, Melville KT, Davies SF, Bond CS, Smith SM, Flematti GR,**  
904 **Waters MT** (2020) Divergent receptor proteins confer responses to different karrikins in two  
905 ephemeral weeds. *Nat Commun* **11**: 1264
- 906 **Toh S, Holbrook-Smith D, Stogios PJ, Onopriyenko O, Lumba S, Tsuchiya Y, Savchenko**  
907 **A, McCourt P** (2015) Structure-function analysis identifies highly sensitive strigolactone  
908 receptors in *Striga*. *Science* **350**: 203–207
- 909 **Toh S, Holbrook-Smith D, Stokes ME, Tsuchiya Y, McCourt P** (2014) Detection of parasitic  
910 plant suicide germination compounds using a high-throughput *Arabidopsis* HTL/KAI2  
911 strigolactone perception system. *Chem Biol* **21**: 988–998
- 912 **Tsuchiya Y, Yoshimura M, Sato Y, Kuwata K, Toh S, Holbrook-Smith D, Zhang H, McCourt**  
913 **P, Itami K, Kinoshita T, et al** (2015) PARASITIC PLANTS. Probing strigolactone receptors  
914 in *Striga hermonthica* with fluorescence. *Science* **349**: 864–868
- 915 **Ueda H, Kusaba M** (2015) Strigolactone Regulates Leaf Senescence in Concert with Ethylene  
916 in *Arabidopsis*. *Plant Physiol* **169**: 138–147
- 917 **Umehara M, Hanada A, Yoshida S, Akiyama K, Arite T, Takeda-Kamiya N, Magome H,**  
918 **Kamiya Y, Shirasu K, Yoneyama K, et al** (2008) Inhibition of shoot branching by new  
919 terpenoid plant hormones. *Nature* **455**: 195–200
- 920 **Villaécija-Aguilar JA, Hamon-Josse M, Carbonnel S, Kretschmar A, Schmid C, Dawid C,**  
921 **Bennett T, Gutjahr C** (2019) SMAX1/SMXL2 regulate root and root hair development  
922 downstream of KAI2-mediated signalling in *Arabidopsis*. *PLOS Genetics* **15**: e1008327
- 923 **Wang L, Wang B, Jiang L, Liu X, Li X, Lu Z, Meng X, Wang Y, Smith SM, Li J** (2015)  
924 Strigolactone Signaling in *Arabidopsis* Regulates Shoot Development by Targeting D53-

- 925 Like SMXL Repressor Proteins for Ubiquitination and Degradation. *Plant Cell* **27**: 3128–  
926 3142
- 927 **Wang L, Wang B, Yu H, Guo H, Lin T, Kou L, Wang A, Shao N, Ma H, Xiong G, et al** (2020a)  
928 Transcriptional regulation of strigolactone signalling in Arabidopsis. *Nature* **583**: 277–281
- 929 **Wang L, Waters MT, Smith SM** (2018) Karrikin-KAI2 signalling provides Arabidopsis seeds  
930 with tolerance to abiotic stress and inhibits germination under conditions unfavourable to  
931 seedling establishment. *New Phytol* **219**: 605–618
- 932 **Wang L, Xu Q, Yu H, Ma H, Li X, Yang J, Chu J, Xie Q, Wang Y, Smith SM, et al** (2020b)  
933 Strigolactone and Karrikin Signaling Pathways Elicit Ubiquitination and Proteolysis of  
934 SMXL2 to Regulate Hypocotyl Elongation in Arabidopsis. *Plant Cell* **32**: 2251–2270
- 935 **Wang Y, Yao R, Du X, Guo L, Chen L, Xie D, Smith SM** (2021) Molecular basis for high ligand  
936 sensitivity and selectivity of strigolactone receptors in *Striga*. *Plant Physiol* **185**: 1411–1428
- 937 **Waters MT, Nelson DC, Scaffidi A, Flematti GR, Sun YK, Dixon KW, Smith SM** (2012)  
938 Specialisation within the DWARF14 protein family confers distinct responses to karrikins  
939 and strigolactones in Arabidopsis. *Development* **139**: 1285–1295
- 940 **Waters MT, Scaffidi A, Moulin SLY, Sun YK, Flematti GR, Smith SM** (2015) A Selaginella  
941 moellendorffii Ortholog of KARRIKIN INSENSITIVE2 Functions in Arabidopsis  
942 Development but Cannot Mediate Responses to Karrikins or Strigolactones. *Plant Cell* **27**:  
943 1925–1944
- 944 **Xu Y, Miyakawa T, Nakamura H, Nakamura A, Imamura Y, Asami T, Tanokura M** (2016)  
945 Structural basis of unique ligand specificity of KAI2-like protein from parasitic weed *Striga*  
946 hermonthica. *Sci Rep* **6**: 31386
- 947 **Xu Y, Miyakawa T, Nosaki S, Nakamura A, Lyu Y, Nakamura H, Ohto U, Ishida H, Shimizu**  
948 **T, Asami T, et al** (2018) Structural analysis of HTL and D14 proteins reveals the basis for  
949 ligand selectivity in *Striga*. *Nat Commun* **9**: 3947
- 950 **Yao R, Ming Z, Yan L, Li S, Wang F, Ma S, Yu C, Yang M, Chen L, Chen L, et al** (2016)  
951 DWARF14 is a non-canonical hormone receptor for strigolactone. *Nature* **536**: 469–473
- 952 **Yoneyama K, Xie X, Yoneyama K, Kisugi T, Nomura T, Nakatani Y, Akiyama K, McErlean**  
953 **CSP** (2018) Which are the major players, canonical or non-canonical strigolactones? *J Exp*  
954 *Bot* **69**: 2231–2239
- 955 **Yoshida S, Kim S, Wafula EK, Tanskanen J, Kim Y-M, Honaas L, Yang Z, Spallek T, Conn**  
956 **CE, Ichihashi Y, et al** (2019) Genome Sequence of *Striga asiatica* Provides Insight into the  
957 Evolution of Plant Parasitism. *Curr Biol* **29**: 3041–3052.e4
- 958 **Zheng J, Hong K, Zeng L, Wang L, Kang S, Qu M, Dai J, Zou L, Zhu L, Tang Z, et al** (2020)  
959 Karrikin Signaling Acts Parallel to and Additively with Strigolactone Signaling to Regulate  
960 Rice Mesocotyl Elongation in Darkness. *Plant Cell* **32**: 2780–2805
- 961 **Zhou F, Lin Q, Zhu L, Ren Y, Zhou K, Shabek N, Wu F, Mao H, Dong W, Gan L, et al** (2013)  
962 D14-SCF(D3)-dependent degradation of D53 regulates strigolactone signalling. *Nature* **504**:  
963 406–410

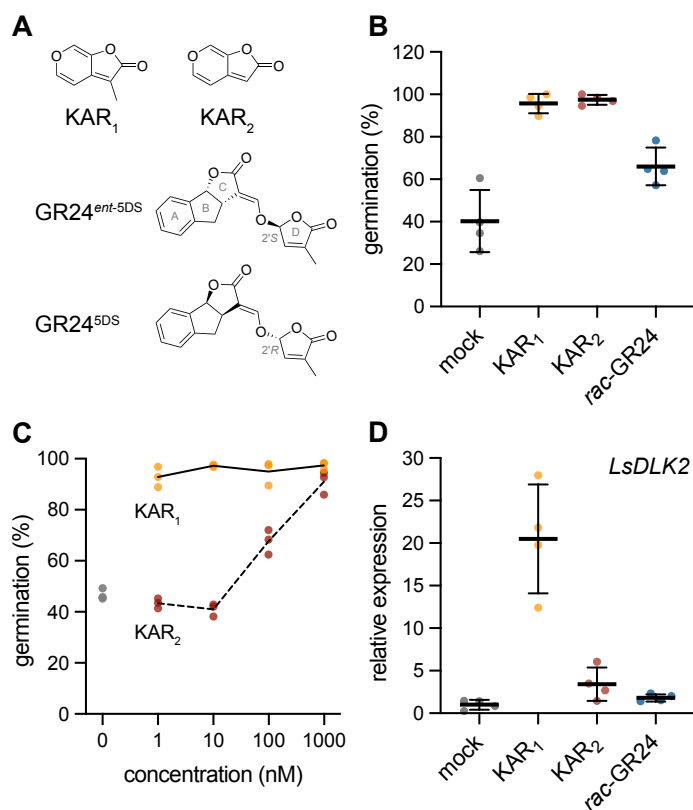

**Figure 1. Lettuce achenes are highly sensitive to KAR<sub>1</sub>.**

A) Structures of KAR<sub>1</sub>, KAR<sub>2</sub>, GR24<sup>ent-5DS</sup>, and GR24<sup>5DS</sup>. GR24<sup>5DS</sup> is a strigolactone analog that mimics the stereochemical configuration of the SL 5-deoxystrigol. GR24<sup>ent-5DS</sup> is an enantiomer of GR24<sup>5DS</sup> that has a methylbutenolide D-ring in 2'S configuration, which is not found in natural SLs. B) Lettuce germination in the presence of 0.1% (v/v) acetone or 1 μM KAR<sub>1</sub>, KAR<sub>2</sub>, or *rac*-GR24. Achenes were incubated 1 h in darkness, followed by a pulse of far-red light for 10 minutes, and the remaining 48 h in darkness at 20°C. n=4 replicates of approximately 50-70 achenes each; mean ± SD. C) Lettuce germination in the presence of a range of KAR<sub>1</sub> and KAR<sub>2</sub> concentrations after 1 h in darkness, followed by a pulse of far-red light for 10 minutes, and the remaining 48 h in darkness at 20°C. n=3 replicates of approximately 50-60 achenes each. D) qRT-PCR analysis of *LsDLK2* expression relative to *LsACT* (actin) in lettuce achenes imbibed with 0.1% (v/v) acetone or 1 μM KAR<sub>1</sub>, KAR<sub>2</sub>, or *rac*-GR24 for 24 h in darkness at 20°C. n=4 pools of achenes; mean ± SD. Values re-scaled to relative *LsDLK2* expression in mock-treated achenes.

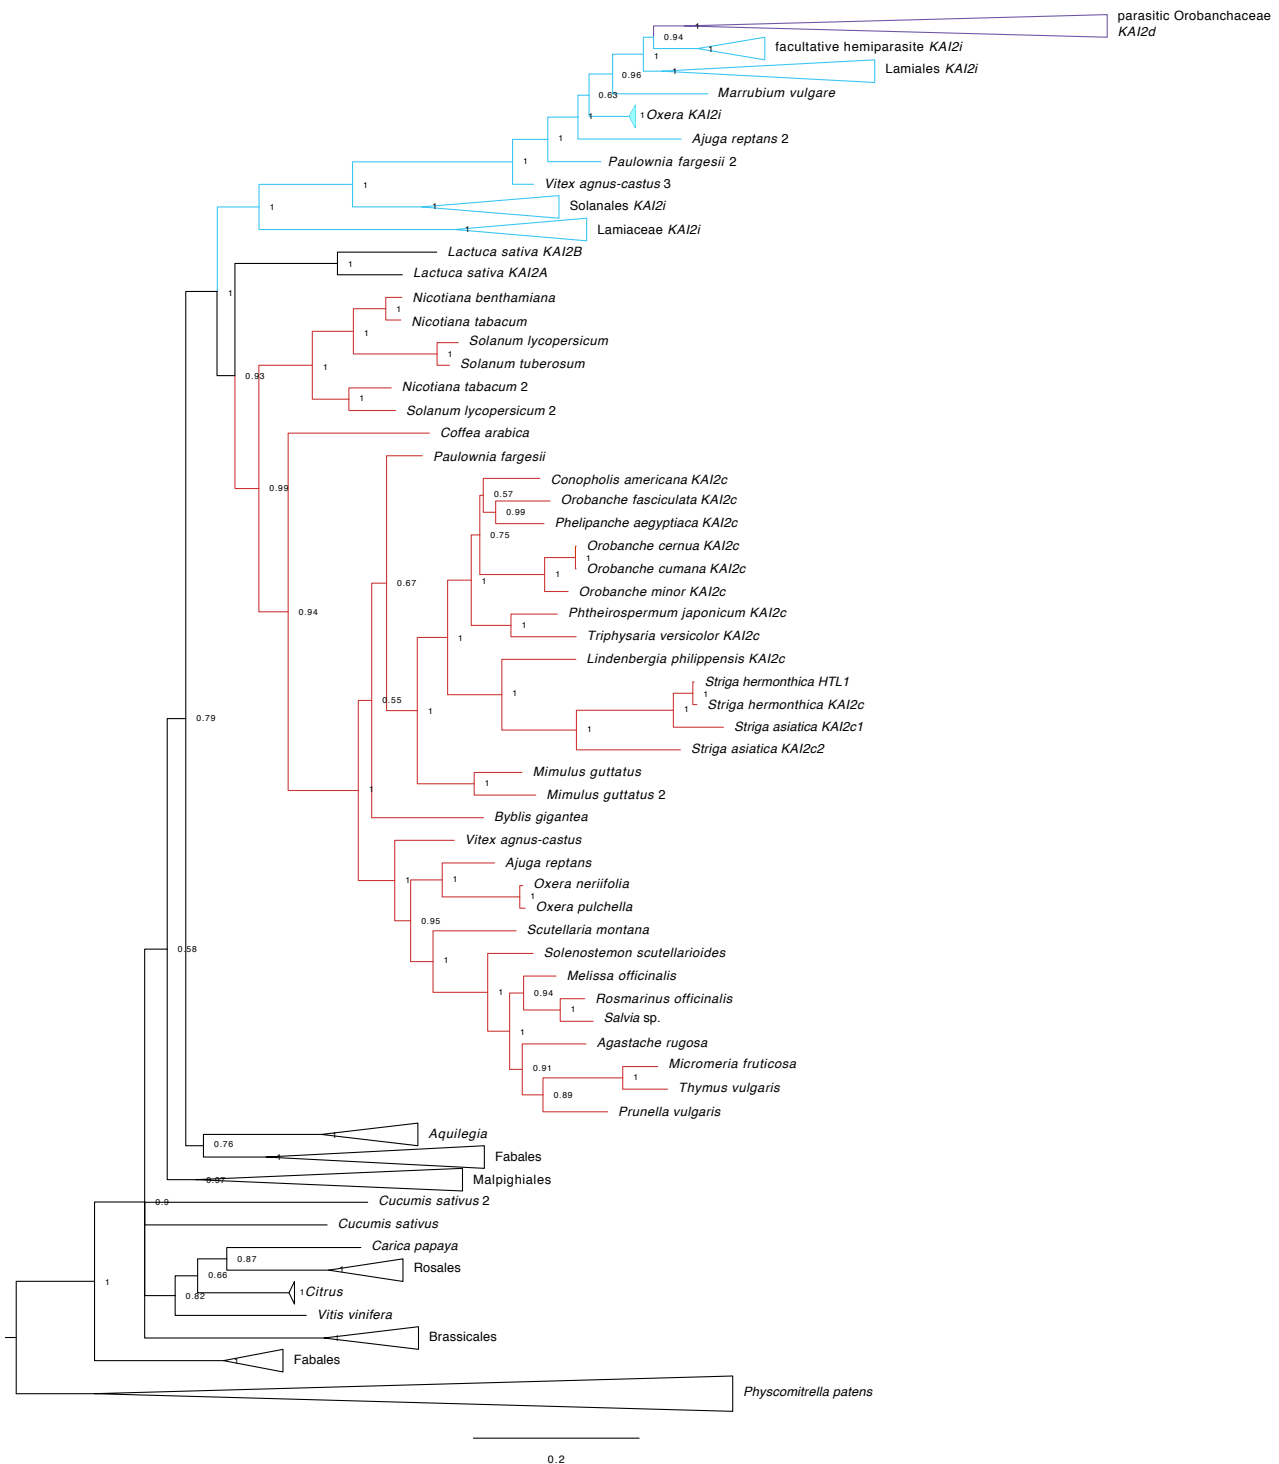

**Figure 2. Lettuce *KAI2* genes group with the conserved *KAI2c* clade.**

Bayesian phylogeny of *KAI2* genes in dicots. Sequences from lamiids fall into the conserved (*KAI2c*, red), intermediate (*KAI2i*, blue), and divergent (*KAI2d*, purple; parasite-specific) clades that were previously described (Conn et al., 2015).

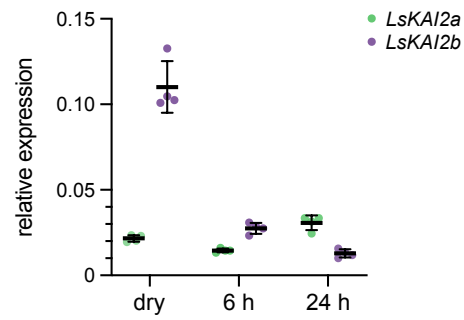

**Figure 3. *LsKAI2b* transcripts are more abundant than *LsKAI2a* during early imbibition.**

qRT-PCR analysis of *LsKAI2a* and *LsKAI2b* expression relative to *LsACT* in lettuce achenes that were un-imbibed (dry), or imbibed in water for 1 h in darkness, followed by 10 min in far-red light, and the remaining time to 6 or 24 h in darkness at 20°C. n=4 pools of achenes; mean  $\pm$  SD.



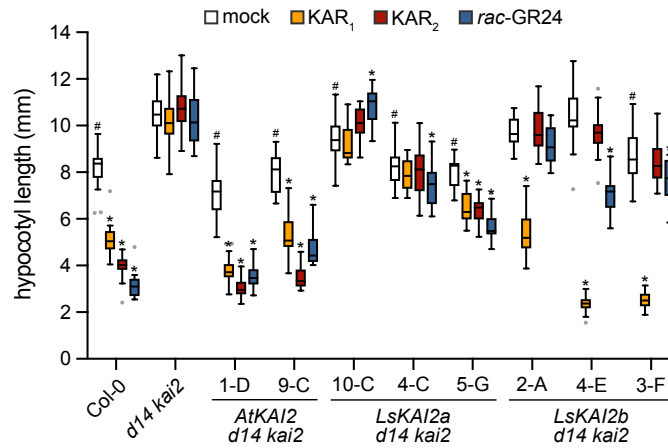

**Figure 4. An LsKAI2b transgene confers strong KAR<sub>1</sub> responses to Arabidopsis seedlings.**

Hypocotyl length of 5-d-old *Arabidopsis thaliana* seedlings grown under red light on 0.5x MS media supplemented with 0.1% (v/v) acetone or 1  $\mu$ M KAR<sub>1</sub>, KAR<sub>2</sub>, or rac-GR24. n=20 seedlings. Box plots indicate median and quartiles with Tukey's whiskers. Gray dots indicate outlier data beyond Tukey's whiskers. \*, p<0.01, Dunnett's multiple comparisons test, treatment versus mock comparison within each line. #, p<0.01, Dunnett's multiple comparisons test, comparison to *d14 kai2*, mock-treated samples only.

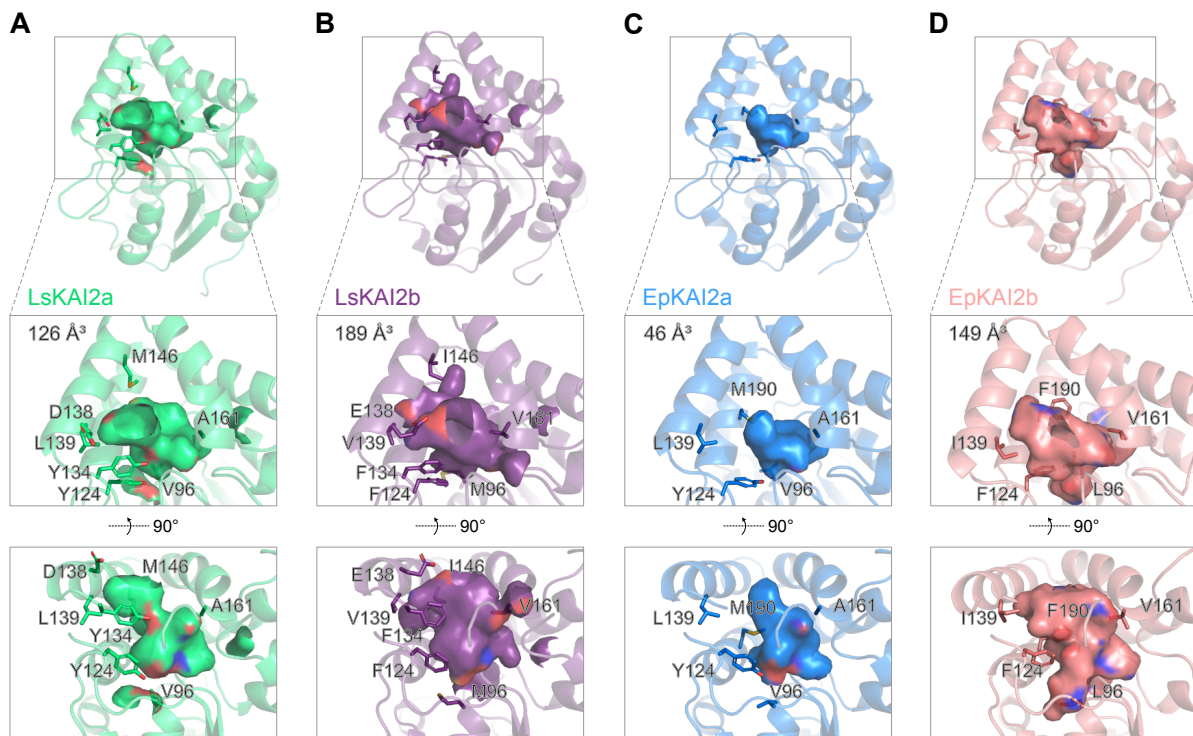

**Figure 5. KAI2b proteins in lettuce and *E. penduliflora* have enlarged ligand-binding pockets.**

Homology models of A) LsKAI2a, B) LsKAI2b, C) EpKAI2a, and D) EpKAI2b. Hydrophobic cavities and their volumes are shown. Pocket residues that differ between KAI2a and KAI2b in each species are indicated.

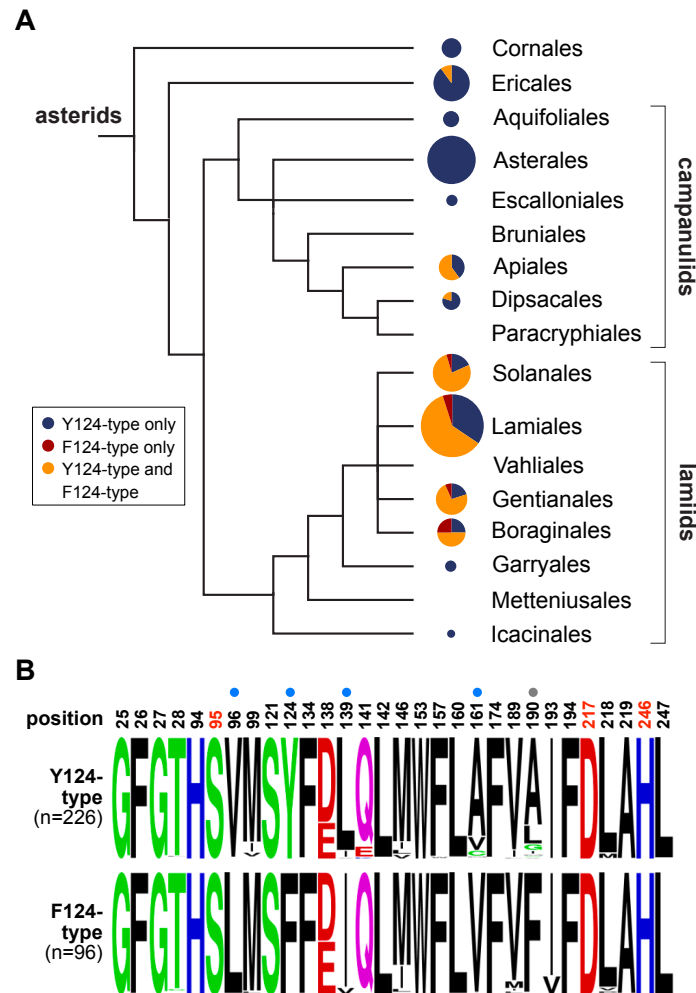

**Figure 6. Two groups of asterid KAI2 have conserved differences at five pocket positions.**

A) Distribution of KAI2 types in asterids. Phylogeny adapted from Angiosperm Phylogeny Group (APG) IV system ([Chase et al., 2016](#)). Pie charts indicate the proportion of species for which only Y124-type KAI2 (blue), only F124-type KAI2 (red), or both Y124-type and F124-type KAI2 (orange) were observed in *de novo* transcriptome assemblies from OneKP. The area of each pie chart is proportional to the number of species that were sampled from each order, from n=1 for Icaciniales to n=60 for Lamiales. B) Frequency plots of amino acid composition in asterid KAI2 proteins at 30 positions that form the ligand-binding pocket. Asterid KAI2 proteins were split into two groups based upon Tyr or Phe amino acid identity at position 124. Dots above residues indicate candidates for ligand specificity-determining residues based upon amino acid conservation within and across the two groups. Blue dots indicate prioritized candidate positions. Position 190 was de-prioritized because LsKAI2b does not have a Phe190 residue but is sensitive to KAR<sub>1</sub> nonetheless.

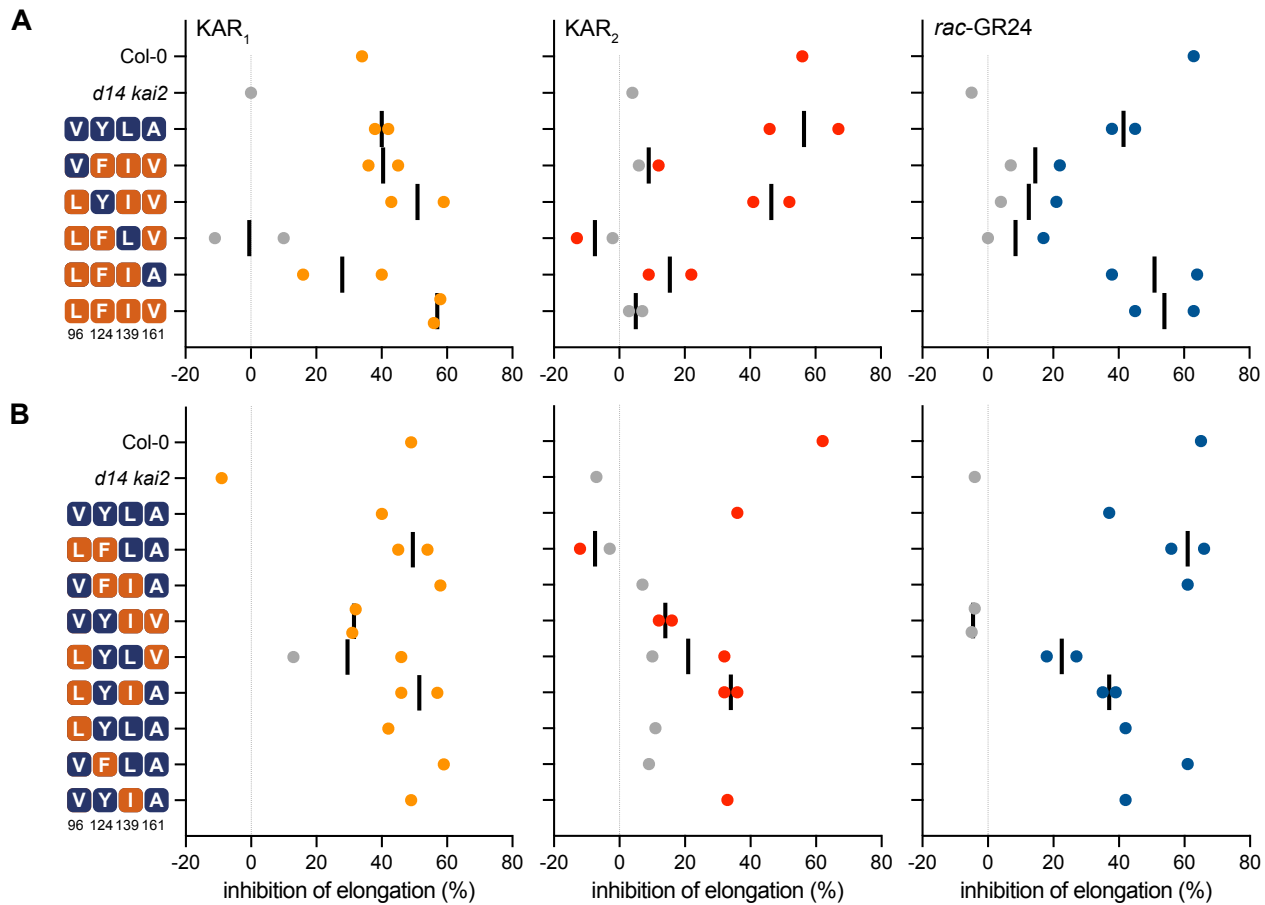

**Figure 7. Pocket residues at positions 96, 124, 139, and 161 affect AtKAI2 ligand-specificity.**

Inhibition of hypocotyl elongation by KAR<sub>1</sub>, KAR<sub>2</sub>, or *rac*-GR24 in 5-d-old seedlings grown in red light for transgenic lines of *AtKAI2* variants with A) quadruple- and triple-, or B) double- and single-substitutions. All transgenic lines are in the *d14 kai2* double mutant background. Data are derived from hypocotyl length measurements shown in Figure S4. Each data point represents growth inhibition for a unique genetic line. Gray points indicate data that were not significantly different from mock-treated controls for each transgenic line.

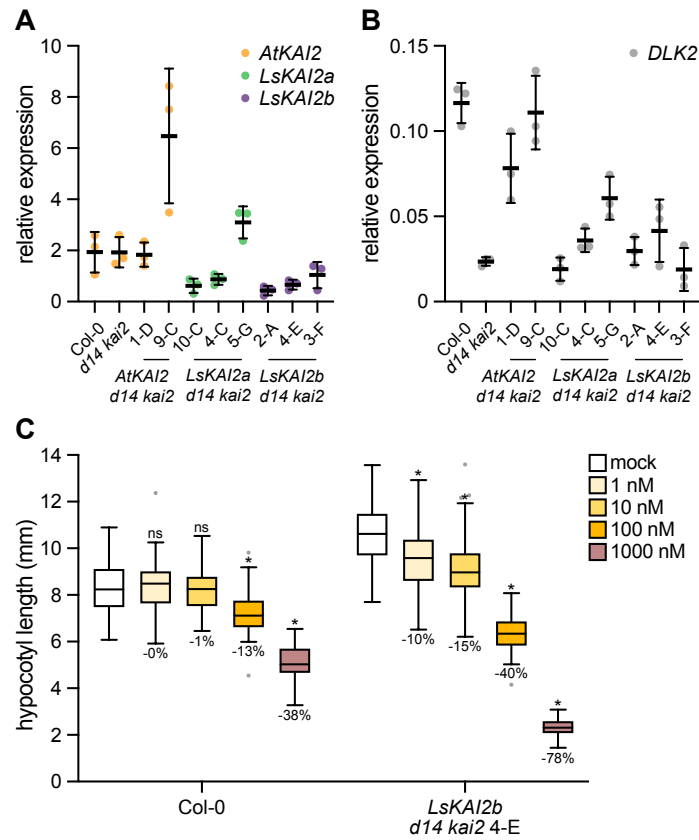

**Figure S1. Transgene expression levels and  $KAR_1$  sensitivity in lettuce *KAI2* transgenic lines.**

A) qRT-PCR analysis of *AtKAI2*, *LsKAI2a*, and *LsKAI2b* expression, or B) *DLK2* expression relative to *CACS* in 5-d-old *Arabidopsis* seedlings grown under red light.  $n=3$  pools of seedlings; mean  $\pm$  SD. B) Hypocotyl length of 5-d-old *Arabidopsis* seedlings grown under red light in the presence of 1 nM to 1000 nM  $KAR_1$ . Percent growth inhibition relative to mock-treated control within genotype is indicated below each treatment boxplot. \*,  $p<0.01$ , Dunnett's multiple comparisons test, treatment versus mock comparison within each line.

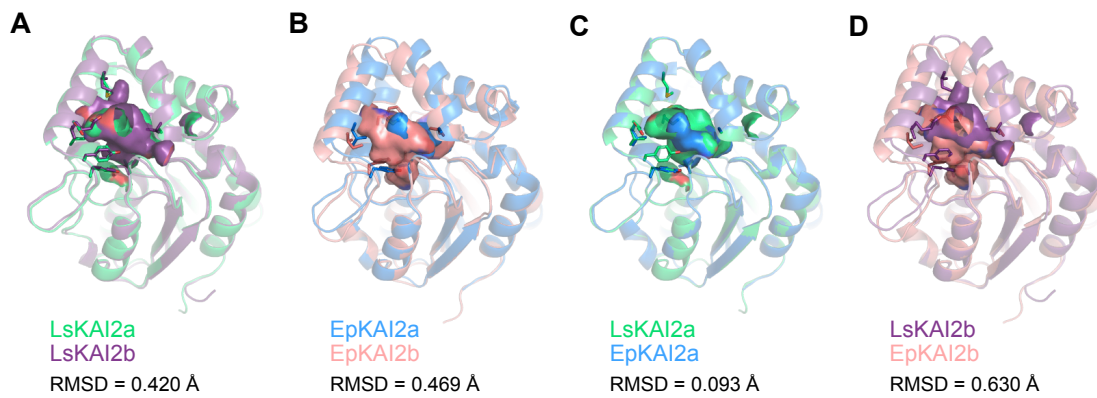

**Figure S2. Comparisons of lettuce and *E. penduliflora* KAI2 structures within and across species.**

Overlaid homology models comparing A) LsKAI2a and LsKAI2b, B) EpKAI2a and EpKAI2b, C) LsKAI2a and EpKAI2a, and D) LsKAI2b and EpKAI2b. Hydrophobic cavities are shown with residues highlighted in Figure 6 as sticks. RMSD values are shown for each pair of models.



CLUSTAL O(1.2.4) multiple sequence alignment

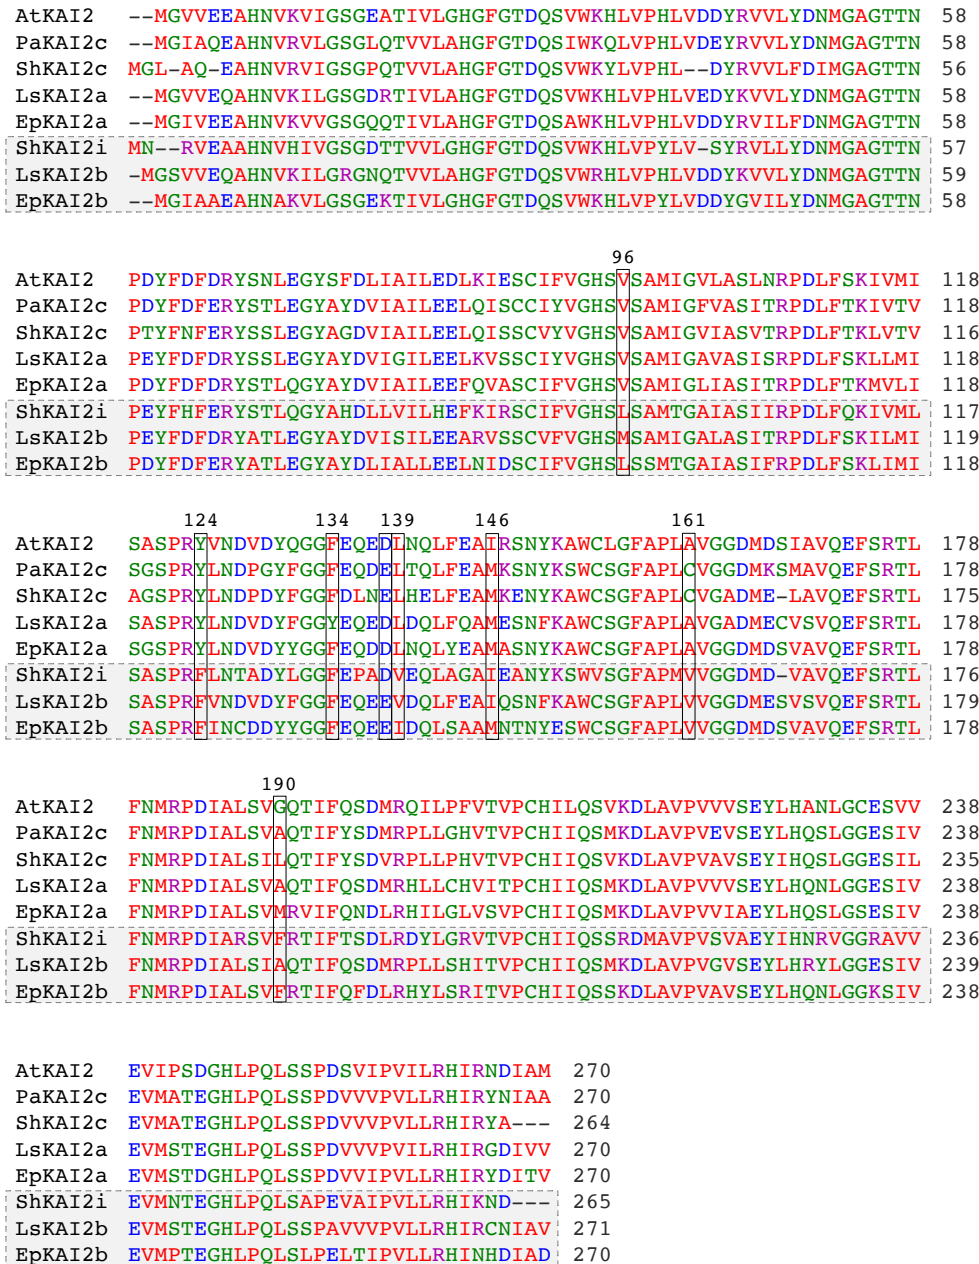

**Figure S3. Sequence comparison of several characterized KAI2 proteins.**

Multiple sequence alignment by Clustal Omega of KAI2 proteins from *Arabidopsis thaliana*, *Phelipanche aegyptiaca*, *Striga hermonthica*, *Lactuca sativa*, and *Emmenanthe penduliflora*. ShKAI2i and LsKAI2b show selective responses to KAR<sub>1</sub>, and EpKAI2b is hypothesized to have similar properties. Pocket residues that were different between either LsKAI2a and LsKAI2b, or EpKAI2 and EpKAI2b are highlighted in boxes.

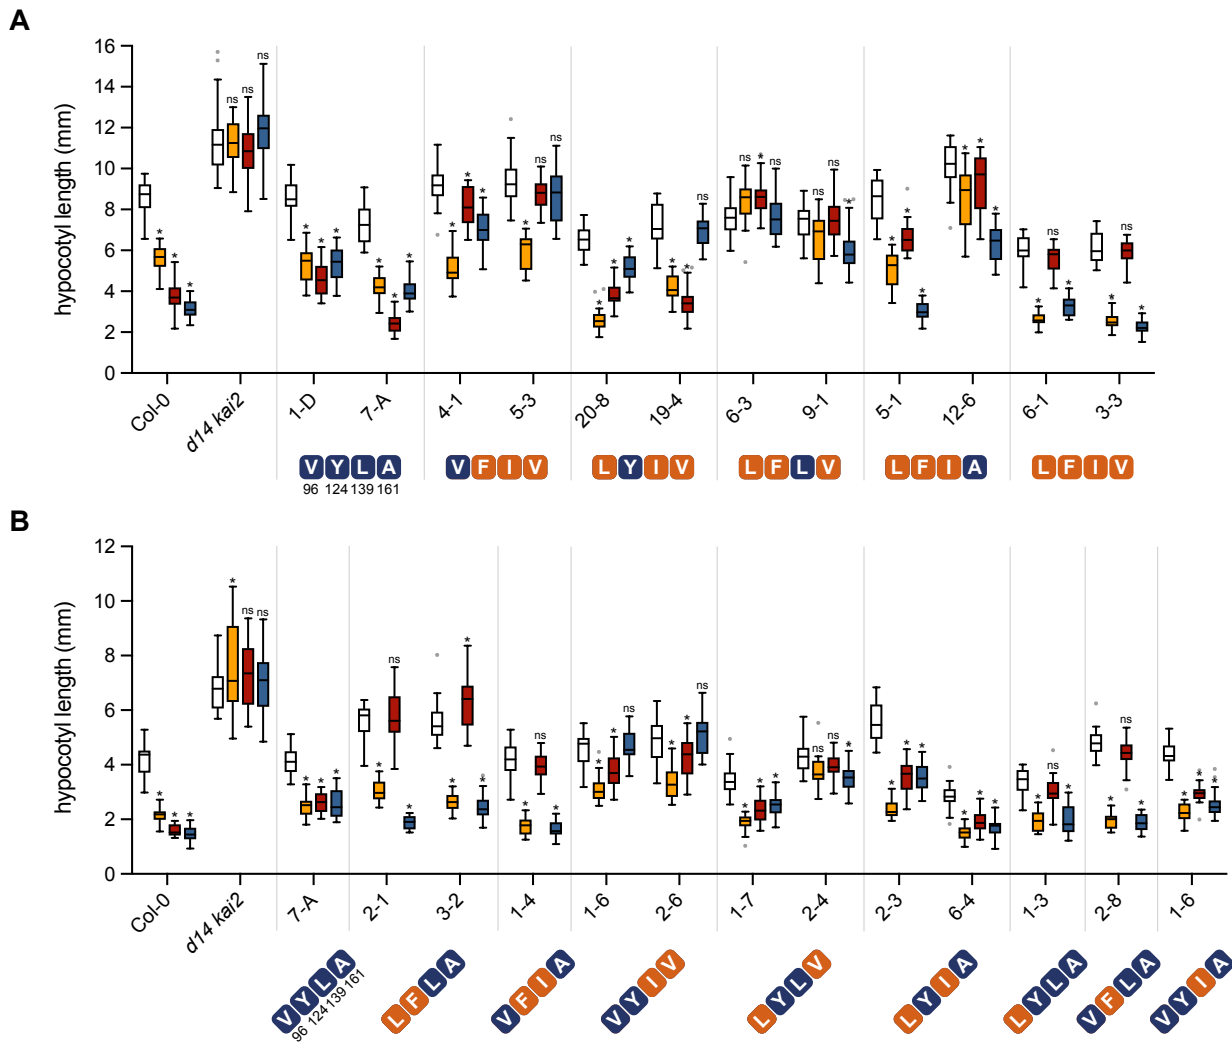

**Figure S4. Hypocotyl elongation responses to KARs and *rac*-GR24 conferred by *AtKAI2* variants.**

Hypocotyl lengths of 5-d-old *Arabidopsis* seedlings grown in red light in the presence of 0.1% (v/v) acetone or 1  $\mu$ M KAR<sub>1</sub>, KAR<sub>2</sub>, or *rac*-GR24.

Transgenic lines carry *AtKAI2* variants with A) quadruple- and triple-, or B) double- and single-substitutions at positions 96, 124, 139, and 161. All transgenic lines are in the *d14 kai2* double mutant background. n=20 (transgenics) or 40 seedlings (wt and *d14 kai2*) for A) and n=20 seedlings for B).

Box plots indicate median and quartiles with Tukey's whiskers. Gray dots indicate outlier data beyond Tukey's whiskers. \*, p<0.01, Dunnett's multiple comparisons test, treatment versus mock comparison within each line. Growth inhibition responses to KAR and *rac*-GR24 treatments are summarized in Figure 7.
